# Supplementary material for: Advances in magnetic nanoparticles for molecular medicine
Source: Royal Society of Chemistry journal article supplement (doi:10.1039/d4cc05167j), 2025-01-01
Supplement: d4cc05167j1.xlsx [file d4cc05167j1.xlsx]

## Sheet: Sheet1
Source: clinicaltrials.gov
NCT Number	Study Title	Conditions	Interventions	Sponsor	Study Type	Start Date	Study Status	Locations
NCT00034333	Safety and Efficacy of Doxorubicin Adsorbed to Magnetic Beads Vs. IV Doxorubicin in Treating Liver Cancer	Carcinoma, Hepatocellular	DRUG: MTC-DOX for Injection	FeRx	INTERVENTIONAL	2002-03	TERMINATED	Long Beach VA Medical Center, Long Beach, California, 90822, United States|VAMC San Francisco and Comprehensive Cancer Ctr., San Francisco, California, 94121, United States|Northwestern Univ. Med. School, Chicago, Illinois, 60611, United States|Weill Medical College of Cornell University, New York, New York, 10021, United States|Univ. of North Carolina at Chapel Hill, Chapel Hill, North Carolina,…
NCT00041808	Magnetic-Targeted Doxorubicin in Treating Patients With Cancer Metastatic to the Liver	Metastases, Neoplasm|Colorectal Neoplasms|Esophageal Neoplasms|Stomach Neoplasms|Pancreatic Neoplasms|Breast Neoplasms|Melanoma|Sarcoma|Gastrointestinal Neoplasms|Lung Neoplasms|Liver Neoplasms|Cholangiocarcinoma	DRUG: MTC-DOX for Injection|PROCEDURE: Chemotherapy	FeRx	INTERVENTIONAL	2001-07	COMPLETED	Scripps Stevens Cancer Division, San Diego, California, 92037, United States|UCSF Cancer Center, San Francisco, California, 94143, United States|Scott and White Clinic, Temple, Texas, 76508, United States|Frankfurt Universtiy, Frankfurt, 60590, Germany
NCT00054951	Safety and Efficacy of Doxorubicin Adsorbed to Magnetic Beads	Hepatocellular Carcinoma	DRUG: MTC-DOX for Injection	FeRx	INTERVENTIONAL	2001-06	UNKNOWN	Cancer Institute & Hosp. CAMS, Beijing, China|Chinese PLA Cancer Ctr. Yang Gongjing, Nanjing City, China|Zhong Shan Hospital, Fudan University, Shanghai, China
NCT04894110	Study of Safety and Tolerability of EO2002 in the Treatment of Corneal Edema	Corneal Edema|Corneal Endothelial Dysfunction|Corneal Endothelial Dystrophy|Fuchs Dystrophy|Fuchs Endothelial Corneal Dystrophy|Pseudophakic Bullous Keratopathy|Bullous Keratopathy|Endothelial Dysfunction|Moderate Corneal Endothelial Decompensation	BIOLOGICAL: EO2002|BIOLOGICAL: EO2002 low dose|BIOLOGICAL: EO2002 mid dose|BIOLOGICAL: EO2002 high dose	Emmecell	INTERVENTIONAL	2021-06-22	ACTIVE_NOT_RECRUITING	Los Angeles Location, Los Angeles, California, 91208, United States|San Diego Location, San Diego, California, 92122, United States|Miami Location, Miami, Florida, 33136, United States|Palm Beach Gardens Location, Palm Beach Gardens, Florida, 33410, United States|Atlanta Location, Atlanta, Georgia, 30339, United States|Des Moines Location, Des Moines, Iowa, 50266, United States|Kansas City Locati…
NCT01270139	Plasmonic Nanophotothermal Therapy of Atherosclerosis	Stable Angina|Heart Failure|Atherosclerosis|Multivessel Coronary Artery Disease	PROCEDURE: Transplantation of nanoparticles|PROCEDURE: Transplantation of iron-bearing nanoparticles|DEVICE: Stenting	Ural State Medical University	INTERVENTIONAL	2007-04-01	COMPLETED	De Haar Research Task Force, Amsterdam, North Holland, 1069CD, Netherlands|Ural Center of Modern Nanotechnologies, Institute of Natural Sciences, Ural Federal University, Yekaterinburg, Sverdlovsk Oblast, 620000, Russian Federation|Transfiguration Clinic, Yekaterinburg, Sverdlovsk Oblast, 620078, Russian Federation|Ural Institute of Cardiology, Yekaterinburg, Sverdlovsk Oblast, 620144, Russian Fe…
NCT01411904	A Novel Magnetic Needle Using Iron Oxide Nanoparticles for the Detection of Leukemia	Leukemia	DEVICE: MagProbe (TM)	University of New Mexico	INTERVENTIONAL	2010-08	WITHDRAWN	University of New Mexico Health Sciences Center, Albuquerque, New Mexico, 87131, United States
NCT02025413	Isolation of Circulating Tumor Cells Using a Novel EMT-Based Capture Method	Metastatic Progressive Castration-resistant Prostate Cancer|Metastatic Progressive Breast Cancer	DEVICE: Mesenchymal-marker based ferrofluid (N-cadherin or O-cadherin based)	Duke University	INTERVENTIONAL	2011-11	COMPLETED	Duke University Medical Center, Durham, North Carolina, 27710, United States
NCT05010759	Study of Focal Ablation of the Prostate With NanoThermÂ® Therapy System for Intermediate-Risk Prostate Cancer	Prostate Cancer	DEVICE: NanoTherm Ablation	MagForce USA	INTERVENTIONAL	2021-11-30	TERMINATED	Florida Urology Partners, Tampa, Florida, 33615, United States|Urology Austin, Austin, Texas, 78759, United States|MagForce - San Antonio, San Antonio, Texas, 78229, United States|MagForce USA, Seattle, Washington, 98105, United States
NCT02033447	Magnetic Nanoparticle Thermoablation-Retention and Maintenance in the Prostate:A Phase 0 Study in Men	Prostate Cancer	OTHER: Magnetic Nanoparticle Injection	University College London Hospitals	INTERVENTIONAL	2013-12	COMPLETED	University College London Hospital, London, NW1 2BU, United Kingdom
NCT06271421	NanoTherm In Adjuvant Therapy of Glioblastoma Multiforme	Glioblastoma Multiforme	DEVICE: NanoTherm therapy|PROCEDURE: Glioma Resection|RADIATION: radiotherapy according to Stupp protocol|DRUG: chemotherapy according to Stupp protocol	Poznan University of Medical Sciences	INTERVENTIONAL	2024-01-01	RECRUITING	University Hospital, PoznaÅ„, 60-355, Poland
NCT00255424	Ferumoxytol Versus Oral Iron in the Treatment of Anemia in Non-Dialysis Dependent Chronic Kidney Disease Patients	Anemia	DRUG: ferumoxytol or oral iron	AMAG Pharmaceuticals, Inc.	INTERVENTIONAL	2004-05	COMPLETED	Encino, California, 91356, United States|Riverside, California, 92501, United States|Tarzana, California, 91356, United States|Ocala, Florida, 34471, United States|Shreveport, Louisiana, 71101, United States|Shreveport, Louisiana, 71103, United States|Springfield, Massachusetts, 01107, United States|Detroit, Michigan, 48236, United States|Flushing, New York, 11355, United States|Orchard Park, New…
NCT00255437	Ferumoxytol Versus Oral Iron in the Treatment of Anemia in Non-Dialysis Dependent Chronic Kidney Disease Patients	Anemia	DRUG: ferumoxytol or oral iron	AMAG Pharmaceuticals, Inc.	INTERVENTIONAL	2004-06	COMPLETED	Phoenix, Arizona, 85012, United States|Tempe, Arizona, 85284, United States|New Haven, Connecticut, 06511, United States|Augusta, Georgia, 30901, United States|Peoria, Illinois, 61603, United States|Bethesda, Maryland, 20814, United States|Boston, Massachusetts, 02115, United States|Detroit, Michigan, 48202, United States|Columbus, Mississippi, 39705, United States|Broken Bow, Nebraska, 68822, Un…
NCT00255450	A Crossover Safety Study of Ferumoxytol Versus Placebo	Anemia	DRUG: ferumoxytol or placebo	AMAG Pharmaceuticals, Inc.	INTERVENTIONAL	2005-01	COMPLETED	Mobile, Alabama, 36608, United States|Phoenix, Arizona, 85012, United States|Mountain View, California, 94041, United States|New Haven, Connecticut, 06511, United States|Washington, District of Columbia, 20854, United States|Ocala, Florida, 34471, United States|Tampa, Florida, 33614, United States|Atlanta, Georgia, 30308, United States|Augusta, Georgia, 30901, United States|Newman, Georgia, 30265…
NCT00233597	Ferumoxytol Versus Oral Iron in the Treatment of Anemia in Hemodialysis Patients	Anemia	DRUG: ferumoxytol or oral iron	AMAG Pharmaceuticals, Inc.	INTERVENTIONAL	2004-08	COMPLETED	Phoenix, Arizona, 85012, United States|Tempe, Arizona, 85284, United States|Los Angeles, California, 90073, United States|Mountain View, California, 94014, United States|New Haven, Connecticut, 06511, United States|Hudson, Florida, 34667, United States|Tampa, Florida, 33614, United States|Augusta, Georgia, 30901, United States|Honolulu, Hawaii, 96817, United States|Gurnee, Illinois, 60081, United…
NCT00360425	A Study of the Electrocardiogram Effects and Pharmacokinetics of Ferumoxytol in Healthy Men and Women	Anemia	DRUG: ferumoxytol|DRUG: moxifloxacin|DRUG: placebo	AMAG Pharmaceuticals, Inc.	INTERVENTIONAL	2006-05	COMPLETED	Baltimore, Maryland, 21225, United States
NCT01052779	A Trial Comparing Ferumoxytol to Iron Sucrose for the Treatment of Iron Deficiency Anemia in Adult Subjects With Chronic Kidney Disease	Iron Deficiency|Anemia|Kidney Disease	DRUG: Ferumoxytol|DRUG: Iron Sucrose	AMAG Pharmaceuticals, Inc.	INTERVENTIONAL	2010-03-01	COMPLETED	For additional information regarding investigative sites for this trial, contact 1-877-411-2510 Mon-Fri from 9 AM to 5 PM Eastern Time (UTC/GMT - 5 hours, EST), or speak with your personal physician., Tempe, Arizona, 85284, United States|For additional information regarding investigative sites for this trial, contact 1-877-411-2510 Mon-Fri from 9 AM to 5 PM Eastern Time (UTC/GMT - 5 hours, EST), …
NCT01114139	A Trial Comparing Ferumoxytol With Placebo for the Treatment of Iron Deficiency Anemia	Iron Deficiency Anemia	DRUG: Ferumoxytol|OTHER: Placebo	AMAG Pharmaceuticals, Inc.	INTERVENTIONAL	2010-06-19	COMPLETED	Clinical Trial Site, Birmingham, Alabama, United States|Clinical Trial Site, Mobile, Alabama, United States|Clinical Trial Site, Montgomery, Alabama, 36106, United States|Clinical Trial Site, Montgomery, Alabama, United States|Clinical Trial Site, Green Valley, Arizona, United States|Clinical Trial Site, Phoenix, Arizona, 85032, United States|Clinical Trial Site, Phoenix, Arizona, United States|C…
NCT01114204	A Trial Comparing Ferumoxytol With Iron Sucrose for the Treatment of Iron Deficiency Anemia	Iron Deficiency Anemia	DRUG: Ferumoxytol|DRUG: Iron Sucrose	AMAG Pharmaceuticals, Inc.	INTERVENTIONAL	2010-08-10	COMPLETED	For additional information regarding investigative sites for this trial, contact 1-617-498-3300 Mon-Fri from 9 AM to 5 PM Eastern Time (UTC/GMT - 5 hours, EST), or speak with your personal physician., Adelaide, Australia|For additional information regarding investigative sites for this trial, contact 1-617-498-3300 Mon-Fri from 9 AM to 5 PM Eastern Time (UTC/GMT - 5 hours, EST), or speak with you…
NCT01114217	A Trial of Ferumoxytol for the Episodic Treatment of Iron Deficiency Anemia	Iron Deficiency Anemia	DRUG: Ferumoxytol	AMAG Pharmaceuticals, Inc.	INTERVENTIONAL	2010-07-27	COMPLETED	Clinical Trial Site, Birmingham, Alabama, United States|Clinical Trial Site, Mobile, Alabama, United States|Clinical Trial Site, Montgomery, Alabama, 36106, United States|Clinical Trial Site, Montgomery, Alabama, 36116, United States|Clinical Trial Site, Phoenix, Arizona, 85015, United States|Clinical Trial Site, Phoenix, Arizona, 85032, United States|Clinical Trial Site, Tucson, Arizona, 85710, …
NCT01148745	Iron Indices and Intravenous Ferumoxytol: Time to Steady State	Iron Deficiency Anemia	DRUG: ferumoxytol	Dialysis Clinic, Inc.	INTERVENTIONAL	2010-03	COMPLETED	Dialysis Clinic, Inc., North Brunswick, New Jersey, 08902, United States
NCT01155375	A Trial of Ferumoxytol for the Treatment of Iron Deficiency Anemia in Pediatric Participants With Chronic Kidney Disease	Iron Deficiency Anemia	DRUG: Ferumoxytol|DRUG: Oral Iron	AMAG Pharmaceuticals, Inc.	INTERVENTIONAL	2011-10-17	TERMINATED	AMAG Pharmaceuticals, Inc., Waltham, Massachusetts, 02451, United States
NCT01155388	A Trial of Ferumoxytol for the Treatment of Iron Deficiency Anemia in Pediatric Participants With Nondialysis-Dependent Chronic Kidney Disease	Iron Deficiency Anemia|Nondialysis-dependent Chronic Kidney Disease	DRUG: Ferumoxytol|DRUG: Oral Iron	AMAG Pharmaceuticals, Inc.	INTERVENTIONAL	2011-10-17	TERMINATED	AMAG Pharmaceuticals, Inc., Waltham, Massachusetts, 02451, United States
NCT01374919	Total Dose Infusion of Ferumoxytol(1020mg) in 15 Minutes for Iron Deficiency Anemia	Iron Deficiency Anemia	DRUG: ferumoxytol	Auerbach Hematology Oncology Associates P C	INTERVENTIONAL	2011-06	COMPLETED	Auerbach Hematology and Oncology, Baltimore, Maryland, 21237, United States
NCT01227616	Compare Efficacy/Safety of Repeat Doses of Ferumoxytol With Iron Sucrose in CKD Subjects With IDA and on Hemodialysis	Iron Deficiency Anemia Treatment|Chronic Kidney Disease(CKD)	DRUG: Ferumoxytol|DRUG: Iron Sucrose	AMAG Pharmaceuticals, Inc.	INTERVENTIONAL	2013-08	COMPLETED	For additional information regarding investigative sites for this trial, contact 1-877-411-2510 Mon-Fri from 9 AM to 5 PM Eastern Time (UTC/GMT - 5 hours, EST), or speak with your personal physician, Pine Bluff, Arkansas, 71603, United States|For additional information regarding investigative sites for this trial, contact 1-877-411-2510 Mon-Fri from 9 AM to 5 PM Eastern Time (UTC/GMT - 5 hours, E…
NCT01942460	Ferumoxytol for Iron-Deficiency Anemia in Chronic Kidney Disease and Peritoneal Dialysis Patients	Iron-Deficiency Anemia|Inflammation|Oxidative Stress	DRUG: Ferumoxytol	Georges Ouellet	INTERVENTIONAL	2013-09	COMPLETED	HÃ´pital Maisonneuve-Rosemont, MontrÃ©al, Quebec, H1T 2M4, Canada
NCT01264679	A Trial of Ferumoxytol for the Episodic Treatment of Iron Deficiency Anemia in Pediatric Participants With Chronic Kidney Disease	Iron Deficiency Anemia	DRUG: Ferumoxytol	AMAG Pharmaceuticals, Inc.	INTERVENTIONAL	2011-12-27	TERMINATED	AMAG Pharmaceuticals, Inc., Waltham, Massachusetts, 02451, United States
NCT01984554	Observational Study on the Use of IV (Intravenous) Iron Therapy Among Subjects With Iron Deficiency Anemia	Iron Deficiency Anemia (IDA)		American Regent, Inc.	OBSERVATIONAL	2013-09	COMPLETED	Luitpold Pharmaceuticals, Inc., Norristown, Pennsylvania, 19403, United States
NCT02189889	Active Preoperative Anemia Management in Patients Undergoing Cardiac Surgery	Anemia|Cardiovascular Disease	DRUG: EPO|DRUG: Feraheme	University of Texas Southwestern Medical Center	INTERVENTIONAL	2013-04-09	TERMINATED	Clements University Hospital, Dallas, Texas, 75390-8894, United States|Clements University Hospital, Dallas, Texas, 75390, United States
NCT02694978	A Phase III Safety Study of Ferumoxytol Compared to Ferric Carboxymaltose for the Treatment of Iron Deficiency Anemia (IDA)	Iron Deficiency Anemia	DRUG: Ferumoxytol|DRUG: FCM	AMAG Pharmaceuticals, Inc.	INTERVENTIONAL	2016-02-29	COMPLETED	Clinical Trial Site, Huntsville, Alabama, United States|Clinical Trial Site, Tucson, Arizona, 85741, United States|Clinical Trial Site, Tucson, Arizona, United States|Clinical Trial Site, Anaheim, California, United States|Clinical Trial Site, Chula Vista, California, United States|Clinical Trial Site, Corona, California, United States|Clinical Trial Site, Encino, California, United States|Clinic…
NCT02499354	Pilot Study: Randomized, Placebo-controlled Comparator Trial of IV vs Oral Iron Treatment of RLS With IDA. (IVOR-IDA)	Restless Legs Syndrome|Iron Deficiency Anemia	DRUG: Ferumoxytol intravenous|DRUG: Ferrous sulfate	Auerbach Hematology Oncology Associates P C	INTERVENTIONAL	2014-08	COMPLETED	Auerbach Hematology Oncology Assoc, Baltimore, Maryland, 21237, United States
NCT03619850	A Study to Evaluate the Safety (Compared to Iron Sucrose), Efficacy and Pharmacokinetics of Ferumoxytol for the Treatment of Iron Deficiency Anemia (IDA) in Pediatric Subjects With Chronic Kidney Disease (CKD)	Chronic Kidney Disease; Iron Deficiency Anemia	DRUG: Ferumoxytol|DRUG: Iron sucrose	AMAG Pharmaceuticals, Inc.	INTERVENTIONAL	2018-08-13	RECRUITING	Memorial Healthcare System, Hollywood, Florida, 33021, United States|Wayne State University, Detroit, Michigan, 48201, United States|Children's Mercy Hospital, Kansas City, Missouri, 64108, United States|Montefiore Medical Center (MMC) - The Children's Hospital at Montefiore (CHAM), Bronx, New York, 10467, United States|The Feinstein Institute Medical Research Organization of Northwell Health, In…
NCT03657433	Intravenous Infusions of Ferumoxytol Compared to Oral Ferrous Sulfate for the Treatment of Anemia in Pregnancy	Iron Deficiency Anemia of Pregnancy	DIETARY_SUPPLEMENT: Ferrous sulfate 325mg|DRUG: Ferumoxytol	University of Arizona	INTERVENTIONAL	2018-12-17	COMPLETED	University of Arizona, Tucson, Arizona, 85724, United States
NCT03777514	Intravenous (IV) Versus Oral Iron Treatment of Iron Deficiency Anemia in the Post-operative Bariatric Surgical Patient	IDA in the Post-bariatric Surgical Patient	DRUG: Ferumoxytol|DRUG: Ferrous sulfate|OTHER: Oral vitamin C|OTHER: Intravenous normal saline	Johns Hopkins University	INTERVENTIONAL	2019-08	WITHDRAWN
NCT03893045	A Study to Evaluate Ferumoxytol for the Treatment of Iron Deficiency Anemia (IDA) in Pediatric Subjects	Iron Deficiency Anemia	DRUG: ferumoxytol|DRUG: Iron sucrose	AMAG Pharmaceuticals, Inc.	INTERVENTIONAL	2019-09-18	RECRUITING	Arkansas Children's Hospital, Little Rock, Arkansas, 72202, United States|University of Florida, Gainesville, Florida, 32608, United States|Optimus U Corporation, Miami, Florida, 33125, United States|Biomedical Research LLC, Miami, Florida, 33184, United States|Gwinnett Research Institute, Buford, Georgia, 30519, United States|Sun Research Institute, San Antonio, Texas, 78215, United States|JSC S…
NCT04080908	Study to Assess Feasibility and Safety of Iron Repletion With Feraheme in Iron Deficient Patients With Durable Ventricular Assist Device Support	Anemia	DRUG: Ferumoxytol injection	NYU Langone Health	INTERVENTIONAL	2020-01-15	TERMINATED	NYU Langone Health, New York, New York, 10016, United States
NCT04205266	IV Iron vs Oral Iron for Treatment of Anemia in Women With Abnormal Uterine Bleeding	Anemia, Iron Deficiency|Heavy Menstrual Bleeding	DRUG: Ferumoxytol|DRUG: Ferrous Sulfate	Thomas Jefferson University	INTERVENTIONAL	2020-02-14	RECRUITING	Thomas Jefferson University, Philadelphia, Pennsylvania, 19107, United States
NCT04253626	Comparison of Oral Ferrous Sulfate to Intravenous Ferumoxytol in Antepartum Iron Deficiency Anemia	Pregnancy Related|Anemia, Iron Deficiency	DRUG: Ferumoxytol Injection [Feraheme]|DRUG: Ferrous Sulfate	Stanford University	INTERVENTIONAL	2021-01-21	ACTIVE_NOT_RECRUITING	Stanford University School of Medicine/Lucile Packard Childrens Hospital, Stanford, California, 94305, United States
NCT04268849	Trial of IV vs Oral Iron Treatment of Iron Deficiency Anemia in the Post-Operative Bariatric Surgical Patient	Iron Deficiency Anemia	DRUG: Ferumoxytol|DRUG: Saline|DRUG: Ferrous sulfate tablets|DRUG: Vitamin C	Auerbach Hematology Oncology Associates P C	INTERVENTIONAL	2020-02-27	RECRUITING	Auerbach Hematology and Oncology, Baltimore, Maryland, 21237, United States
NCT04278651	Early Antenatal Support for Iron Deficiency Anemia	Pregnancy Related|Anemia, Iron Deficiency|Anemia of Pregnancy	DRUG: Ferumoxytol|DRUG: Ferrous Sulfate	Thomas Jefferson University	INTERVENTIONAL	2021-09-29	RECRUITING	Thomas Jefferson University Hospital, Philadelphia, Pennsylvania, 19107, United States
NCT05340465	Darbe Plus IV Iron to Decrease Transfusions While Maintaining Iron Sufficiency in Preterm Infants	Prematurity|Iron-deficiency|Iron Deficiency Anemia|Iron Malabsorption	DRUG: Darbepoetin Alfa|DRUG: Low Molecular Weight Iron Dextran|DRUG: Ferumoxytol injection|DRUG: Oral iron supplements	University of Washington	INTERVENTIONAL	2022-11-27	RECRUITING	University of Washington, Seattle, Washington, 98195, United States
NCT00087347	Magnetic Resonance Imaging of Lymph Nodes Using Ferumoxytol in Patients With Primary Prostate or Breast Cancer	Breast Cancer|Prostate Cancer	DRUG: ferumoxytol|PROCEDURE: magnetic resonance imaging	Massachusetts General Hospital	OBSERVATIONAL	2004-09	COMPLETED	Massachusetts General Hospital Cancer Center, Boston, Massachusetts, 02114, United States
NCT00103038	Ferumoxytol in Improving MR Imaging in Patients With High-Grade Brain Tumors or Cerebral Metastases	Central Nervous System Lymphoma|Malignant Glioma|Metastatic Malignant Neoplasm in the Brain	PROCEDURE: 3 Tesla Magnetic Resonance Imaging|PROCEDURE: Dynamic Contrast-Enhanced Magnetic Resonance Imaging|PROCEDURE: Dynamic Susceptibility Contrast-Enhanced Magnetic Resonance Imaging|DRUG: Ferumoxytol|DRUG: Gadolinium|PROCEDURE: MRI-Based Angiogram	OHSU Knight Cancer Institute	INTERVENTIONAL	2004-06-04	COMPLETED	OHSU Knight Cancer Institute, Portland, Oregon, 97239, United States
NCT00107484	Magnetic Resonance Imaging Using Ferumoxtran-10 in Finding Metastases to the Axillary Lymph Nodes in Patients With Breast Cancer	Breast Cancer	DRUG: ferumoxtran-10|PROCEDURE: magnetic resonance imaging|PROCEDURE: sentinel lymph node biopsy	Virginia Commonwealth University	phase 2, INTERVENTIONAL	2005-09	COMPLETED	Massey Cancer Center at Virginia Commonwealth University, Richmond, Virginia, 23298-0037, United States
NCT00147238	A Validation Study of MR Lymphangiography Using SPIO, a New Lymphotropic Superparamagnetic Nanoparticle Contrast	Bladder Cancer|Genitourinary Cancer|Prostate Cancer	DRUG: Ferumoxtran-10 (USPIO)|PROCEDURE: MR lymphangiography	M.D. Anderson Cancer Center	INTERVENTIONAL	2005-07	TERMINATED	U.T.M.D. Anderson Cancer Center, Houston, Texas, 77030, United States
NCT00185029	MR-Lymphography and Lymph Node Staging in Prostate Cancer	Prostatic Neoplasms|Lymphatic Metastasis	PROCEDURE: Ferumoxtran-10 enhanced MRI (MRL)	Radboud University Medical Center	phase 4, INTERVENTIONAL	2002-04	UNKNOWN	NKI AVL, Amsterdam, 1066 CX, Netherlands|Catharina Hospital, Eindhoven, 5602 ZA, Netherlands|Ziekenhuis Zeeuws-Vlaanderen, Terneuzen, 4535 PA, Netherlands
NCT00188695	Combidex USPIO - Ultra-small Superparamagnetic Iron Oxide	Uterine Neoplasms|Cervix Neoplasms|Bladder Neoplasms|Prostatic Neoplasms	PROCEDURE: MRI contrast agent Combidex (ferumoxtran-10)	University Health Network, Toronto	phase 1/2, INTERVENTIONAL	2004-04	COMPLETED	Princess Margaret Hospital, Toronto, Ontario, M5G 2M9, Canada
NCT00243594	Dendritic Cell Vaccination in Melanoma Patients Scheduled for Regional Lymph Node Dissection	Melanoma Stage III or IV	BIOLOGICAL: Dendritic cells labeled with superparamagnetic nanoparticles (Endorem)	Radboud University Medical Center	INTERVENTIONAL	1999-09	COMPLETED	Radboud University Nijmegen Medical Centre, Nijmegen, PO Box 9101, 6500 HB, Netherlands
NCT00307866	Identification of Hepatic Lesions	Hepatic Neoplasms	PROCEDURE: Resovist (BAY86-4884, SH U 555 A)	Bayer	phase 3, INTERVENTIONAL	2001-04	COMPLETED	Bari, BA, 70124, Italy|Bologna, BO, 40100, Italy|Brescia, BS, 25123, Italy|Firenze, FI, 50100, Italy|Genova, GE, 16132, Italy|Milano, MI, 20132, Italy|Milano, MI, 20142, Italy|Milano, MI, Italy|Palermo, PA, Italy|Pisa, PI, 56126, Italy|Sassari, SS, 07100, Italy|Torino, TO, 10154, Italy|Trieste, TS, 34149, Italy|Verona, VE, 37134, Italy|Chieti, 66100, Italy|L'Aquila, 67100, Italy|Roma, 00144, Ital…
NCT00368589	Effects Of Atorvastatin On Macrophage Activity And Plaque Inflammation Using Magnetic Resonance Imaging	Atherosclerotic Carotid Disease|Atheroma|Atherosclerosis	DRUG: atorvastatin	GlaxoSmithKline	OBSERVATIONAL	2006-07	COMPLETED	GSK Investigational Site, Cambridge, Cambridgeshire, CB2 2GG, United Kingdom
NCT00372281	Cliavist in Infectious and Degenerative Diseases of the Spine	Spine Infection	DRUG: Cliavist	University Hospital, Strasbourg, France	phase 3, INTERVENTIONAL	2007-03	UNKNOWN	Service de Neuroradiologie - HÃ´pital Central, Nancy, 54035, France|Nouvel HÃ´pital Civil, Strasbourg, 67091, France|Service de Radiologie 2 - HÃ´pital de Hautepierre, Strasbourg, 67098, France|Service de Rhumatologie - HÃ´pital de Hautepierre, Strasbourg, 67098, France
NCT00416455	Fludeoxyglucose (FDG) F 18 PET Scan, CT Scan, and Ferumoxtran-10 MRI Scan Before Chemotherapy and Radiation Therapy in Finding Lymph Node Metastasis in Patients With Locally Advanced Cervical Cancer or High-Risk Endometrial Cancer	Cervical Adenocarcinoma|Cervical Adenosquamous Cell Carcinoma|Cervical Small Cell Carcinoma|Cervical Squamous Cell Carcinoma|Endometrial Clear Cell Carcinoma|Endometrial Papillary Serous Carcinoma|Stage I Endometrial Carcinoma|Stage IB Cervical Cancer|Stage II Endometrial Carcinoma|Stage IIA Cervical Cancer|Stage IIB Cervical Cancer|Stage III Cervical Cancer|Stage III Endometrial Carcinoma|Stage …	RADIATION: fludeoxyglucose F 18|PROCEDURE: positron emission tomography|PROCEDURE: computed tomography|DRUG: ferumoxtran-10|PROCEDURE: magnetic resonance imaging|PROCEDURE: diagnostic lymphadenectomy|PROCEDURE: lymph node biopsy	National Cancer Institute (NCI)	phase 1/2, INTERVENTIONAL	2007-09	COMPLETED	Jonsson Comprehensive Cancer Center, Los Angeles, California, 90095, United States|University of California at Los Angeles Health System, Los Angeles, California, 90095, United States|Olive View-University of California Los Angeles Medical Center, Sylmar, California, 91342, United States|The Hospital of Central Connecticut, New Britain, Connecticut, 06050, United States|Sarasota Memorial Hospital…
NCT00453817	Islet of Langerhans Graft Monitoring by Magnetic Resonance Imaging	Type 1 Diabetes Mellitus	DRUG: ferucarbotran (iron-based MRI contrast agent)|PROCEDURE: Islet transplantation|PROCEDURE: Magnetic resonance imaging	University Hospital, Geneva	phase 1, INTERVENTIONAL	2005-06	TERMINATED	Geneva University Hospitals Department of Surgery, Geneva, 1211, Switzerland
NCT00585936	Imaging Inflammation in Autoimmune Diabetes	Diabetes Mellitus, Type 1		Joslin Diabetes Center	OBSERVATIONAL	2007-09	COMPLETED	Joslin Diabetes Center, Boston, Massachusetts, 02215, United States
NCT00622973	USPIO-enhanced and Diffusion-weighted MRI for the Detection of Pelvic Lymph Node Metastases	Prostate Cancer|Bladder Cancer	OTHER: Imaging: diffusion-weighted MRI|OTHER: Sinerem (USPIO) enhanced MRI	Insel Gruppe AG, University Hospital Bern	phase 3, INTERVENTIONAL	2007-09	COMPLETED	Inselspital, Bern, 3010, Switzerland
NCT00659126	Ferumoxytol- and Gadolinium-Labeled MRI in Measuring Tumors Before or After Treatment in Patients With Primary or Metastatic Brain Tumors	Metastatic Malignant Neoplasm in the Brain|Primary Brain Neoplasm	PROCEDURE: 3 Tesla Magnetic Resonance Imaging|PROCEDURE: Dynamic Contrast-Enhanced Magnetic Resonance Imaging|PROCEDURE: Dynamic Susceptibility Contrast-Enhanced Magnetic Resonance Imaging|DRUG: Ferumoxytol|DRUG: Gadolinium|PROCEDURE: High Field Strength Magnetic Resonance Imaging|PROCEDURE: Susceptibility Weighted Imaging	OHSU Knight Cancer Institute	phase 2, INTERVENTIONAL	2006-11-16	TERMINATED	OHSU Knight Cancer Institute, Portland, Oregon, 97239, United States
NCT00659334	Imaging of Intravenous (IV) Combidex to Brain, Intra-cerebral Tumors and in Central Nervous System (CNS) Inflammation	Brain Neoplasms	DRUG: Ferumoxtran-10 (Combidex)|PROCEDURE: Neurosurgery	OHSU Knight Cancer Institute	phase 2, INTERVENTIONAL	2000-08	TERMINATED	Oregon Health & Science University, Portland, Oregon, 97239, United States
NCT00659776	MR, Histologic And EM Imaging Of Intravenous Ferumoxytol In Central Nervous System (CNS) Inflammation	Nervous System Diseases|Diagnostic Imaging	DRUG: Ferumoxytol	Oregon Health and Science University	phase 2, INTERVENTIONAL	2004-07	TERMINATED	Oregon Health & Science University, Portland, Oregon, 97239, United States
NCT00660543	MRI Study With Ferumoxytol in Assessing Early Response in Patients With Glioblastoma Multiforme Receiving Temozolomide and Radiation Therapy	Adult Brain Glioblastoma	DRUG: Gadolinium|DRUG: Ferumoxytol Non-Stoichiometric Magnetite|OTHER: Dynamic Contrast-Enhanced Magnetic Resonance Imaging|OTHER: Dynamic Susceptibility Contrast-Enhanced Magnetic Resonance Imaging|OTHER: Diffusion Weighted Imaging|OTHER: MRI-Based Angiogram	OHSU Knight Cancer Institute	INTERVENTIONAL	2006-12	COMPLETED	OHSU Knight Cancer Institute, Portland, Oregon, 97239, United States
NCT00707876	Magnetic Resonance Angiography for Peripheral Arterial Disease (PAD)	Peripheral Arterial Disease (PAD)	DRUG: ferumoxytol|DRUG: ferumoxytol|DRUG: ferumoxytol	AMAG Pharmaceuticals, Inc.	phase 2, INTERVENTIONAL	2008-09	UNKNOWN	Lexington, Massachusetts, 02421, United States
NCT00769093	Assessing Dynamic Magnetic Resonance (MR) Imaging in Patients With Recurrent High Grade Glioma Receiving Chemotherapy	Brain Neoplasms	DRUG: Ferumoxytol	OHSU Knight Cancer Institute	phase 1, INTERVENTIONAL	2008-10	TERMINATED	Oregon Health & Science University, Portland, Oregon, 97239, United States
NCT00781872	Mesenchymal Stem Cells for the Treatment of MS	Multiple Sclerosis	BIOLOGICAL: Injection of autologous bone marrow derived mesenchymal stem cells	Hadassah Medical Organization	INTERVENTIONAL	2006-10	COMPLETED
NCT00794092	Magnetic Resonance Imaging of Aortic Aneurysm Instability	Aortic Aneurysm	DRUG: Sinerem administration	University of Edinburgh	phase 2/3, INTERVENTIONAL	2008-11	COMPLETED	University of Edinburgh/Royal Infirmary of Edinburgh, Edinburgh, Midlothian, Eh16 4SA, United Kingdom
NCT00886444	Comparative Evaluation of Various Combinable Magnetic Resonance (CMR) Pulse-sequences for Macrophage Imaging Using Ferucarbotran	Acute Myocardial Infarction	DRUG: Ferucarbotran (Resovist)	Robert Bosch Gesellschaft fÃ¼r Medizinische Forschung mbH	phase 2/3, INTERVENTIONAL	2009-03	COMPLETED	Robert-Bosch-Krankenhaus, Division of Cardiology, Stuttgart, 70376, Germany
NCT00920023	Pre-Operative Staging of Pancreatic Cancer Using Superparamagnetic Iron Oxide Magnetic Resonance Imaging (SPIO MRI)	Pancreatic Cancer	DRUG: Superparamagnetic Iron Oxide Magnetic Resonance Imaging	Massachusetts General Hospital	phase 4, INTERVENTIONAL	2008-07	COMPLETED	Massachusetts General Hospital, Boston, Massachusetts, 02114, United States
NCT00972946	Cell Tracking Using Superparamagnetic Particles of Iron Oxide (SPIO) and Magnetic Resonance Imaging (MRI) - A Pilot Study	Healthy Volunteer	BIOLOGICAL: Administration of autologous Endorem-labelled mononuclear cells intravenously|DRUG: Administration of Endorem	University of Edinburgh	INTERVENTIONAL	2009-09	COMPLETED	University of Edinburgh/Royal Infirmary of Edinburgh, Edinburgh, EH16 4SA, United Kingdom
NCT00978562	DSC-MRI With Ferumoxytol and DCE-MRI With Gadolinium in Imaging Vascular Properties in Younger Patients With Brain Tumors	Childhood Brain Neoplasm|Recurrent Childhood Brain Neoplasm	PROCEDURE: Dynamic Contrast-Enhanced Magnetic Resonance Imaging|PROCEDURE: Dynamic Susceptibility Contrast-Enhanced Magnetic Resonance Imaging|DRUG: Ferumoxytol Non-Stoichiometric Magnetite|DRUG: Gadolinium	OHSU Knight Cancer Institute	phase 1, INTERVENTIONAL	2009-08	COMPLETED	OHSU Knight Cancer Institute, Portland, Oregon, 97239, United States
NCT01127113	Inflammatory Cell Trafficking After Myocardial Infarction	Myocardial Infarction|Inflammation	OTHER: Infusion of investigational product|OTHER: Cardiac magnetic resonance imaging	University of Edinburgh	INTERVENTIONAL	2010-01	WITHDRAWN	Royal Infirmary of Edinburgh, Edinburgh, Midlothian, EH16 4SU, United Kingdom
NCT01169935	Tracking Inflammatory Cells Using Superparamagnetic Particles of Iron Oxide (SPIO) and Magnetic Resonance Imaging (MRI)	Healthy	DRUG: Administration of intra-dermal Endorem|BIOLOGICAL: Mantoux test|BIOLOGICAL: Autologous Endorem-labelled mononuclear cells|DRUG: Administration of Endorem	University of Edinburgh	INTERVENTIONAL	2010-07	COMPLETED	University of Edinburgh / Royal Infirmary of Edinburgh, Edinburgh, Scotland, EH16SU4, United Kingdom
NCT01244282	A Study of Two Methodologies for Measuring Blood Flow in the Brain in Response to Non-Drug Stimuli (P08085/MK-0000-180)	Functional Magnetic Resonance Imaging	PROCEDURE: fMRI with sensory stimulation	Merck Sharp & Dohme LLC	phase 1, INTERVENTIONAL	2010-11	COMPLETED
NCT01323296	Ferumoxytol for Magnetic Resonance Imaging of Myocardial Infarction	Myocardial Infarction	OTHER: Ferumoxytol	University of Edinburgh	INTERVENTIONAL	2010-11	COMPLETED	Royal Infirmary of Edinburgh, Edinburgh, Midlothian, EH16 4SA, United Kingdom|University of Edinburgh, Edinburgh, Midlothian, EH16 4SU, United Kingdom
NCT01336803	Differentiation of Bone Sarcomas and Osteomyelitis With Ferumoxytol-Enhanced MRI	Bone Cancer|Chondrosarcoma|Ewing's Sarcoma|Osteosarcoma|Rhabdomyosarcoma|Bone Necrosis|Bone Sarcoma|Osteomyelitis	DRUG: Feraheme|PROCEDURE: Magnetic Resonance Imaging (MRI) scan	Heike E Daldrup-Link	INTERVENTIONAL	2011-08	COMPLETED	Stanford University School of Medicine, Stanford, California, 94305, United States
NCT01521520	Imaging of Type 1 Diabetes Progression	Type 1 Diabetes	DRUG: ferumoxytol	Jason Gaglia	OBSERVATIONAL	2012-01	UNKNOWN	Massachusetts General Hospital, Boston, Massachusetts, 02114, United States
NCT01542879	Development of Radiation Free Whole Body Magnetic Resonance (MR) Imaging Technique for Staging Children With Cancer	Cancer	PROCEDURE: WB-DW-MR scan|PROCEDURE: 18-F-FDG PET scan|DRUG: Ferumoxytol|PROCEDURE: 18-F-FDG PET/MR scan	Heike E Daldrup-Link	INTERVENTIONAL	2012-02	RECRUITING	Stanford University Cancer Institute, Stanford, California, 94305, United States
NCT01663090	Ferumoxytol-Enhanced MRI in Adult/Pedi Sarcomas	Soft Tissue Sarcoma	DRUG: Ferumoxytol	Dana-Farber Cancer Institute	INTERVENTIONAL	2012-09	WITHDRAWN	Massachusetts General Hospital, Boston, Massachusetts, 02114, United States|Brigham and Women's Hospital, Boston, Massachusetts, 02115, United States|Children's Hospital Boston, Boston, Massachusetts, 02115, United States|Dana-Farber Cancer Institute, Boston, Massachusetts, 02115, United States
NCT01665846	Ferumoxytol-enhanced Brain MRI in HIV-associated Neurocognitive Disorders	HIV Dementia	DRUG: Ferumoxytol	University of Hawaii	INTERVENTIONAL	2011-07	COMPLETED	Hawaii Center for AIDS, Honolulu, Hawaii, 96816, United States
NCT01674257	Metabolic Imaging in Carotid Atherosclerosis	Atherosclerosis|Stroke	OTHER: USPIO (ferumoxytol)-enhanced MRI scan|RADIATION: 18f-Fluoride PET/CT scan|RADIATION: 18F-Flurodeoxyglucose PET/CT scan	University of Edinburgh	OBSERVATIONAL	2012-10-10	COMPLETED	Clinical Research Imaging Centre, Edinburgh, EH16 4TJ, United Kingdom
NCT01710072	Aspirin Attenuates Inflammation in Human Cerebral Aneurysms	The Focus of the Study is to Monitor MRI Signal Changes and Inflammatory Biomarkers With Use of Aspirin in Patients With Unruptured Cerebral Aneurysm	DRUG: aspirin	University of Iowa	INTERVENTIONAL	2011-08	COMPLETED	University of Iowa hospitals and Clinics, Iowa CIty, Iowa, 52242, United States
NCT01770353	MM-398 (Nanoliposomal Irinotecan, Nal-IRI) to Determine Tumor Drug Levels and to Evaluate the Feasibility of Ferumoxytol Magnetic Resonance Imaging to Measure Tumor Associated Macrophages and to Predict Patient Response to Treatment	Solid Tumors|ER/PR Positive Breast Cancer|Triple Negative Breast Cancer|Metastatic Breast Cancer With Active Brain Metastasis	DRUG: Ferumoxytol|DRUG: MM-398	Ipsen	INTERVENTIONAL	2012-11	COMPLETED	Mayo Clinic, Scottsdale, Arizona, 85159-5499, United States|HonorHealth, Scottsdale, Arizona, 85258, United States|UCSF Helen Diller Family Comprehensive Cancer Center, San Francisco, California, 94115, United States|Moffitt Cancer Center, Tampa, Florida, 33607, United States|University of Michighan Comprehensive Cancer Center, Ann Arbor, Michigan, 48109, United States|Washington University, Sain…
NCT01815333	Clinical and Technical Feasibility of a Ultrasuperparamagnetic Nanoparticle Iron Oxide (USPIO)-Enhanced Magnetic Resonance Lymph Node Imaging	Cancer of Lymph Node	DRUG: Feraheme|PROCEDURE: Magnetic Resonance Imaging (MRI)	M.D. Anderson Cancer Center	INTERVENTIONAL	2013-07	COMPLETED	University of Texas MD Anderson Cancer Center, Houston, Texas, 77030, United States
NCT01895829	Ferumoxytol - Iron Oxide Nanoparticle Magnetic Resonance Dynamic Contrast Enhanced MRI	Head and Neck Cancer	PROCEDURE: Magnetic Resonance Imaging (MRI)|DRUG: Ferumoxytol	M.D. Anderson Cancer Center	INTERVENTIONAL	2013-09-12	TERMINATED	University of Texas MD Anderson Cancer Center, Houston, Texas, 77030, United States
NCT01927887	Pre-Operative Nodal Staging of Thyroid Cancer Using USPIO MRI: Preliminary Study	Papillary Carcinoma of Thyroid Gland|Metastatic Medullary Thyroid Cancer|Follicular Thyroid Cancer Lymph Node Metastasis	DRUG: Ferumoxytol|DEVICE: Nanoparticle MRI	Massachusetts General Hospital	INTERVENTIONAL	2012-07	COMPLETED	Massachusetts General Hospital, Boston, Massachusetts, 02114, United States
NCT01973517	High-Field MRI Iron-Based Contrast-Enhanced Characterization of Multiple Sclerosis and Demyelinating Diseases	Multiple Sclerosis	DRUG: Feraheme|DRUG: Gadolinium-based contrast	Stanford University	OBSERVATIONAL	2014-04	WITHDRAWN	Richard M. Lucas Center for Imaging (of Stanford University), Stanford, California, 94304, United States|Stanford Hospitals and Clinics, Stanford, California, 94305, United States
NCT01983371	Diagnostic Accuracy of Ferumoxytol-Enhanced MRI for Detecting Lymph Node Metastases in Colorectal Cancer	Colorectal Cancer	DRUG: Ferumoxytol|OTHER: Magnetic Resonance Imaging	Scott Potenta, MD, PhD	INTERVENTIONAL	2013-12	WITHDRAWN	University of Vermont Medical Center, Burlington, Vermont, 05401, United States
NCT01995799	IRon Nanoparticle Enhanced MRI in the Assessment of Myocardial infarctioN	Myocardial Infarction|Inflammation	DEVICE: Ferumoxytol enhanced MRI	University of Edinburgh	INTERVENTIONAL	2013-05-24	COMPLETED	Royal Infirmary of Edinburgh, Edinburgh, Lothian, EH16 4SA, United Kingdom|Clinical Research Imaging Centre, Edinburgh, Lothian, EH16 4TJ, United Kingdom
NCT02006108	Imaging Kidney Transplant Rejection Using Ferumoxytol-Enhanced Magnetic Resonance	Renal Transplant Rejection	DRUG: Feraheme|OTHER: MRI-GE Healthcare 3 Tesla magnet	Stanford University	INTERVENTIONAL	2012-11-27	COMPLETED	Lucile Packard Children's Hospital, Stanford, California, 94305, United States
NCT02055196	Genetically Modified Stem Cells and Irinotecan Hydrochloride in Treating Patients With Recurrent High-Grade Gliomas	Adult Anaplastic Astrocytoma|Adult Anaplastic Oligodendroglioma|Adult Giant Cell Glioblastoma|Adult Glioblastoma|Adult Gliosarcoma|Recurrent Adult Brain Tumor	BIOLOGICAL: carboxylesterase-expressing allogeneic neural stem cells|DRUG: irinotecan hydrochloride|OTHER: laboratory biomarker analysis	City of Hope Medical Center	INTERVENTIONAL		WITHDRAWN	City of Hope Medical Center, Duarte, California, 91010, United States
NCT02070705	DCE MRI in Patients With Pancreatic Cancer	Familial Pancreatic Cancer|Pancreatic Adenocarcinoma|Pancreatic Intraductal Papillary-Mucinous Neoplasm	PROCEDURE: Dynamic Contrast-Enhanced Magnetic Resonance Imaging|DRUG: Ferumoxytol	OHSU Knight Cancer Institute	INTERVENTIONAL	2014-01-31	RECRUITING	OHSU Knight Cancer Institute, Portland, Oregon, 97239, United States
NCT02080650	Characterization of Circulating Tumor Cells Captured by c-MET (CTC-MET)	Prostate Cancer|Renal Cell Carcinoma|Bladder Cancer|Colorectal Cancer|Gastric Cancer|Pancreatic Cancer|Non-small Cell Lung Cancer|Advanced MET Amplified Solid Tumor	DEVICE: Mesenchymal-marker based ferrofluid (c-MET)|DEVICE: Epithelial cell adhesion molecule (EpCAM) ferrofluid	Duke University	INTERVENTIONAL	2014-03	COMPLETED	Duke University Medical Center, Durham, North Carolina, 27710, United States
NCT02084303	Imaging Neuroinflammation in Epilepsy With Ferumoxytol MRI	Epilepsy	OTHER: Ferumoxytol injection after focal epileptic seizure followed by iron-sensitive MRI	Dartmouth-Hitchcock Medical Center	INTERVENTIONAL	2014-03	COMPLETED	Dartmouth-Hitchcock Medical Center, Lebanon, New Hampshire, 03756, United States
NCT02141490	Study of Ferumoxytol Enhanced MRI for Detecting Lymph Node Metastases in Prostate, Bladder, and Kidney Cancers	Prostate Cancer|Bladder Cancer|Kidney Cancer	DRUG: Ferumoxytol|DIAGNOSTIC_TEST: Magnetic Resonance Imaging (MRI)	National Cancer Institute (NCI)	INTERVENTIONAL	2014-05-15	COMPLETED	National Institutes of Health Clinical Center, 9000 Rockville Pike, Bethesda, Maryland, 20892, United States
NCT02226523	Magnetic Nanoparticles System in Acute Coronary Syndrome	Acute Coronary Syndrome		Far Eastern Memorial Hospital	OBSERVATIONAL	2014-02	COMPLETED	Far Eastern Memorial Hospital, New Taipei City, 220, Taiwan|National Taiwan University Hospital, Taipei, 100, Taiwan|Taoyuan General Hospital, Ministry of Health and Welfare, Taoyuan, 33004, Taiwan
NCT02249208	Sentinel Lymph Node Biopsy With Superparamagnetic Iron Oxide for Breast Cancer Patients After Neoadjuvant Treatment.	Breast Cancer	DEVICE: Tc+blue dye|DEVICE: Tc+SPIO|DEVICE: SPIO alone	Hospital Universitari Vall d'Hebron Research Institute	INTERVENTIONAL	2014-04	UNKNOWN	Hospital Universitario Vall D Hebron., Barcelona, 08035, Spain
NCT02253602	Innovative MRI Techniques to Improve Treatment Stratification of Patients With Esophageal Cancer	Esophageal Neoplasms	DRUG: Ferumoxytol	Academisch Medisch Centrum - Universiteit van Amsterdam (AMC-UvA)	INTERVENTIONAL	2014-09	COMPLETED	Academic Medical Center, Amsterdam, Noord Holland, 1105AZ, Netherlands
NCT02319278	DEtection of Cellular Inflammation With FERumoxytol in the HEART	Cardiac Transplant|Cardiac Sarcoid|Myocarditis|Healthy Volunteers	DRUG: Ferumoxytol	University of Edinburgh	INTERVENTIONAL	2014-12	COMPLETED	Royal Infirmary of Edinburgh, Edinburgh, United Kingdom|Golden Jubilee National Hospital, Glasgow, United Kingdom|Royal Brompton Hospital, London, United Kingdom
NCT02359097	Steady State Blood Volume Maps Using Ferumoxytol Non-stoichiometric Magnetite MRI in Imaging Patients With Glioblastoma	Glioblastoma	PROCEDURE: Dynamic Susceptibility Contrast-Enhanced Magnetic Resonance Imaging|DRUG: Ferumoxytol|DRUG: Gadoteridol|PROCEDURE: Magnetic Resonance Imaging	OHSU Knight Cancer Institute	INTERVENTIONAL	2015-01-06	COMPLETED	Ohio State University Comprehensive Cancer Center, Columbus, Ohio, 43210, United States|OHSU Knight Cancer Institute, Portland, Oregon, 97239, United States
NCT02452216	Using Ferumoxytol-Enhanced MRI to Measure Inflammation in Patients With Brain Tumors or Other Conditions of the CNS	Brain Injury|Central Nervous System Degenerative Disorder|Central Nervous System Infectious Disorder|Central Nervous System Vascular Malformation|Hemorrhagic Cerebrovascular Accident|Ischemic Cerebrovascular Accident|Primary Brain Neoplasm|Brain Cancer|Brain Tumors	DRUG: Ferumoxytol|OTHER: Tissue Analysis|PROCEDURE: Magnetic Resonance Imaging	Michael Iv	INTERVENTIONAL	2015-06-10	COMPLETED	Stanford University Hospitals and Clinics, Stanford, California, 94305, United States
NCT02466828	qBOLD MRI of Glioblastoma Multiforme for Assessment of Tumor Hypoxia.	Glioblastoma|Hypoxia	DRUG: FerahemeÂ®	Sunnybrook Health Sciences Centre	INTERVENTIONAL	2015-03	COMPLETED	Sunnybrook Health Sciences Centre, Toronto, Ontario, M4N 3M5, Canada|St. Michael's Hospital, Toronto, Ontario, M5B 1W8, Canada
NCT02479178	A Study of BIND-014 in Patients With Urothelial Carcinoma, Cholangiocarcinoma, Cervical Cancer and Squamous Cell Carcinoma of the Head and Neck	Urothelial Carcinoma|Cholangiocarcinoma|Cervical Cancer|Squamous Cell Carcinoma of Head and Neck	DRUG: BIND-014 (docetaxel nanoparticles for injectable suspension)	BIND Therapeutics	INTERVENTIONAL	2015-06	TERMINATED	Investigative Site: #20, Goodyear, Arizona, 85338, United States|Investigative Site: #42, Greenbrae, California, 94904, United States|Investigative Site: #39, Denver, Colorado, 80045, United States|Investigative Site: #34, Detroit, Michigan, 48201, United States|Investigative Site: #34, St. Louis, Missouri, 63110, United States|Investigative Site: #43, Las Vegas, Nevada, 89169, United States|Inve…
NCT02511028	In Vivo Characterization of Inflammation With Ferumoxytol, an Ultrasmall Superparamagnetic Iron Oxide Nanoparticle, on 7 Tesla Magnetic Resonance Imaging	Multiple Sclerosis	DRUG: Ferumoxytol	National Institute of Neurological Disorders and Stroke (NINDS)	INTERVENTIONAL	2015-11-27	COMPLETED	National Institutes of Health Clinical Center, Bethesda, Maryland, 20892, United States
NCT02549898	Investigation of Vascular Inflammation in Migraine Using Molecular Nano-imaging and Black Blood Imaging MRI	Migraine Headache|Migraine Without Aura	DRUG: Feraheme|DRUG: Cilostazol|OTHER: USPIO-MRI|OTHER: BBI-MRI	Danish Headache Center	INTERVENTIONAL	2015-08	COMPLETED	Rigshospitalet Glostrup, Glostrup, 2600, Denmark
NCT02612870	Sienna+Â® Injection Time Study 4 Arms	Breast Neoplasms	DEVICE: Sienna+ retro|DEVICE: Sienna+ peri|DEVICE: Sienna+ retro 4-6|DEVICE: Sienna+ peri 4-6|DEVICE: Technetium 1	Kantonsspital Baden	INTERVENTIONAL	2016-02	UNKNOWN	Kantonsspital Baden, Baden, 5404, Switzerland|Inselspital Bern, UniversitÃ¤tsklinik fÃ¼r Frauen., Berne, 3010, Switzerland
NCT02631733	Liposomal Irinotecan and Veliparib in Treating Patients With Solid Tumors	Malignant Solid Neoplasm	DRUG: Ferumoxytol|DRUG: Irinotecan Sucrosofate|OTHER: Laboratory Biomarker Analysis|PROCEDURE: Magnetic Resonance Imaging|DRUG: Veliparib	National Cancer Institute (NCI)	INTERVENTIONAL	2017-05-31	ACTIVE_NOT_RECRUITING	Johns Hopkins University/Sidney Kimmel Cancer Center, Baltimore, Maryland, 21287, United States|National Institutes of Health Clinical Center, Bethesda, Maryland, 20892, United States|NCI - Center for Cancer Research, Bethesda, Maryland, 20892, United States|Mayo Clinic in Rochester, Rochester, Minnesota, 55905, United States|NYP/Columbia University Medical Center/Herbert Irving Comprehensive Can…
NCT02678767	Ferumoxytol-enhanced Imaging and Mapping in neuroAIDS	AIDS Dementia Complex	DRUG: Ferumoxytol	Beau Nakamoto	INTERVENTIONAL	2015-02	COMPLETED	Hawaii Center for AIDS, Honolulu, Hawaii, 96813, United States
NCT02689401	MRI Iron Oxide Imaging for Lymph Node Staging in Esophageal Cancer	Esophageal Cancer	DRUG: Ferumoxytol|DEVICE: MRI 3T scanner	Dana-Farber Cancer Institute	INTERVENTIONAL	2016-05	WITHDRAWN
NCT02739425	The Efficacy of Sentimag in Detection of Sentinel Node Biopsy	Breast Cancer|Sentinel Node	DEVICE: Sentimag Device	The Royal Wolverhampton Hospitals NHS Trust	INTERVENTIONAL	2016-09-22	COMPLETED	The Royal Wolverhampton NHS Trust, Wolverhampton, WV10 0QP, United Kingdom
NCT02751606	Nano MRI on 7 Tesla in Rectal and Breast Cancer	Rectal Neoplasms|Breast Neoplasms	DRUG: ferumoxtran-10|DEVICE: 7 Tesla MRI|DEVICE: 3 Tesla MRI	Radboud University Medical Center	INTERVENTIONAL	2015-06	UNKNOWN	Radboud University Medical Centre, Nijmegen, Gelderland, 6500HB, Netherlands
NCT02752191	Feraheme As An MRI Contrast Agent For Pediatric Congenital Heart Disease	Pediatric Congenital Heart Disease	DRUG: ferumoxytol|DRUG: gadofosveset	Paul Finn	INTERVENTIONAL	2016-04	COMPLETED	UCLA Medical Center, Los Angeles, California, 90095, United States
NCT02791568	Advanced MRI for Uteroplacental Flow, Perfusion, Oxygenation & Inflammation	Pregnancy|Obesity|Preeclampsia	PROCEDURE: Ultrasound Scan|PROCEDURE: MRI Scan|DRUG: Ferumoxytol	University of Wisconsin, Madison	OBSERVATIONAL	2017-01-31	COMPLETED	UnityPoint Health-Meriter Hospital, Madison, Wisconsin, 53715, United States|University of Wisconsin-Hospitals and Clinics, Madison, Wisconsin, 53715, United States
NCT02857218	Ferumoxytol-Enhanced MRI in Imaging Lymph Nodes in Patients With Stage IIB-IIIC Esophageal Cancer	Stage IIB Esophageal Cancer AJCC v7|Stage III Esophageal Cancer AJCC v7|Stage IIIA Esophageal Cancer AJCC v7|Stage IIIB Esophageal Cancer AJCC v7|Stage IIIC Esophageal Cancer AJCC v7	DRUG: Ferumoxytol|PROCEDURE: Magnetic Resonance Imaging	OHSU Knight Cancer Institute	INTERVENTIONAL	2018-04-27	WITHDRAWN
NCT02893293	Imaging of Osteonecrosis With Ferumoxytol-Enhanced MRI	Osteonecrosis	DRUG: Ferumoxytol-enhanced magnetic resonance imaging|DEVICE: Magentic Resonance Imaging	Stanford University	INTERVENTIONAL	2015-05	ENROLLING_BY_INVITATION	Lucile Packard Children's Hospital, Stanford, California, 94305, United States
NCT02954510	Ferumoxytol-enhanced Magnetic Resonance Imaging	Coronary Artery Disease	DRUG: ferumoxytol	Brigham and Women's Hospital	INTERVENTIONAL	2017-02-01	ACTIVE_NOT_RECRUITING	Brigham and Women's Hospital, Boston, Massachusetts, 02115, United States
NCT02977637	MRA With Feraheme in HHT	Hereditary Hemorrhagic Telangiectasia	PROCEDURE: Feraheme MRI/MRA	University of California, Los Angeles	INTERVENTIONAL	2016-11	COMPLETED	UCLA, Los Angeles, California, 90095, United States
NCT02997046	Ferumoxytol Enhanced Magnetic Resonance Angiography in Chronic Kidney Disease	Ferric Compounds|Magnetic Resonance Angiography|Vascular Grafting|Arteriovenous Fistula|Kidney Transplantation		Sokratis Stoumpos	OBSERVATIONAL	2016-12-12	COMPLETED	NHS Greater Glasgow and Clyde, Glasgow, G12 8TA, United Kingdom
NCT03084523	Treatment Targets for Inflamed Intracranial Atherosclerosis on Vessel Wall MRI	Stroke|Intracranial Atherosclerosis	DRUG: Ferumoxytol Injectable Product	Yale University	INTERVENTIONAL	2017-04-26	RECRUITING	Yale University, New Haven, Connecticut, 06510, United States
NCT03173066	Ferumoxytol as a Contrast Agent for Pulmonary Magnetic Resonance Angiography	Pulmonary Embolism	DRUG: Ferumoxytol	Brigham and Women's Hospital	INTERVENTIONAL	2018-09-21	COMPLETED	Brigham and Women's Hospital, Boston, Massachusetts, 02115, United States
NCT03179449	In Vivo Characterization of Macrophages in Pediatric Patients With Malignant Brain Tumors Using Ferumoxytol-enhanced MRI	Childhood Brain Neoplasm	DIAGNOSTIC_TEST: Diagnostic (ferumoxytol-enhanced MRI)|PROCEDURE: Surgery|DRUG: Ferumoxytol|OTHER: Tissue Analysis	Michael Iv	INTERVENTIONAL	2017-07-01	WITHDRAWN
NCT03223064	Accuracy of Lymph Node Imaging in Prostate Cancer: PSMA PET-CT and Nano-MRI	Prostate Cancer|Lymph Node Metastases	DIAGNOSTIC_TEST: Ferumoxtran-10 enhanced MRI; MRI contrast agent|DIAGNOSTIC_TEST: 68Ga PSMA PET-CT	Radboud University Medical Center	INTERVENTIONAL	2016-12-30	UNKNOWN	Radboud University Medical Centre, Nijmegen, Gelderland, 6500HB, Netherlands|Catharina Ziekenhuis Eindhoven, Eindhoven, Netherlands|Canisius Wilhelmina Ziekenhuis, Nijmegen, 6532 SZ, Netherlands
NCT03234309	Ferumoxytol in Magnetic Resonance Imaging of Pediatric Patients With Brain Tumors	Brain Neoplasm	DRUG: Ferumoxytol|PROCEDURE: Magnetic Resonance Imaging	OHSU Knight Cancer Institute	INTERVENTIONAL	2017-10-20	WITHDRAWN
NCT03243435	Sienna+MR Long-term Uptake	Breast Cancer Female	PROCEDURE: Native 1,5 Tesla breast MRI	Kantonsspital Baden	OBSERVATIONAL	2016-07	COMPLETED	Kantonsspital Baden, Baden, Aargau, Switzerland
NCT03264300	Development and Validation of Advanced MRI Methods for Clinical Applications	Brain Tumor	OTHER: MRI|OTHER: MRI	St. Joseph's Hospital and Medical Center, Phoenix	INTERVENTIONAL	2017-06-26	UNKNOWN	St. Joseph's Hospital and Medical Center, Phoenix, Arizona, 85013, United States
NCT03266848	Quantitative Non-Invasive Brain Imaging Using QUTE-CE MRI	Cerebrovascular Disorders	DIAGNOSTIC_TEST: Quantitative Magnetic Resonance Imaging	Theranano LLC	OBSERVATIONAL	2017-11-08	COMPLETED	Massachusetts General Hospital, Boston, Massachusetts, 02114, United States
NCT03270059	Gadolinium and Ferumoxytol MRI in Diagnosing Patients With Abnormalities in the Central Nervous System	Central Nervous System Neoplasm|Cranial Nerve Disorder|Metastatic Malignant Neoplasm in the Brain	DRUG: Ferumoxytol|DRUG: Gadolinium|PROCEDURE: Magnetic Resonance Imaging	OHSU Knight Cancer Institute	INTERVENTIONAL	2017-10-06	RECRUITING	OHSU Knight Cancer Institute, Portland, Oregon, 97239, United States
NCT03280277	Ferumoxytol-Enhanced MRI in Imaging Lymph Nodes in Patients With Locally Advanced Rectal Cancer	Locally Advanced Rectal Carcinoma|Stage III Rectal Cancer AJCC v7|Stage IIIA Rectal Cancer AJCC v7|Stage IIIB Rectal Cancer AJCC v7|Stage IIIC Rectal Cancer AJCC v7	PROCEDURE: Contrast-enhanced Magnetic Resonance Imaging|DRUG: Ferumoxytol	OHSU Knight Cancer Institute	INTERVENTIONAL	2018-04-27	TERMINATED	OHSU Knight Cancer Institute, Portland, Oregon, 97239, United States
NCT03325166	Pembrolizumab and Magnetic Resonance Imaging With Ferumoxytol in Treating Patients With Non-small Cell Lung Cancer and Brain Metastases	Lung Carcinoma Metastatic in the Brain|Stage IV Lung Non-Small Cell Cancer AJCC v7	DRUG: Ferumoxytol|OTHER: Laboratory Biomarker Analysis|PROCEDURE: Magnetic Resonance Imaging|BIOLOGICAL: Pembrolizumab	OHSU Knight Cancer Institute	INTERVENTIONAL	2017-11-03	TERMINATED	OHSU Knight Cancer Institute, Portland, Oregon, 97239, United States
NCT03342677	Evaluation of Gd-EOB-DTPA MRI for Detection and Characterization of Liver Nodules in Cirrhotic Patients Undergoing Liver Transplantation and Potential Impact on Transplant Eligibility	Hepatocellular Carcinoma	DIAGNOSTIC_TEST: Primovist MRI	University Health Network, Toronto	INTERVENTIONAL	2017-11-07	UNKNOWN	University Health Network, Toronto, Ontario, M5G 1Z5, Canada
NCT03347617	Ferumoxytol MRI in Assessing Response to Pembrolizumab in Patients With Glioblastoma	Glioblastoma	DRUG: Ferumoxytol|OTHER: Laboratory Biomarker Analysis|PROCEDURE: Magnetic Resonance Imaging|BIOLOGICAL: Pembrolizumab	OHSU Knight Cancer Institute	INTERVENTIONAL	2017-12-20	ACTIVE_NOT_RECRUITING	OHSU Knight Cancer Institute, Portland, Oregon, 97239, United States
NCT03358563	Pilot Trial of Chemohormonal Therapy Followed by Prostatectomy in High Risk Prostate Cancer	Prostate Cancer	DRUG: Docetaxel|DRUG: Degarelix|DRUG: Bicalutamide|RADIATION: Ferumoxytol-enhanced MRI imaging	University of Wisconsin, Madison	INTERVENTIONAL	2018-01-17	COMPLETED	University of Wisconsin Carbone Cancer Center, Madison, Wisconsin, 53792, United States
NCT03449615	Validation of Ferromagnetic Tracer in Melanoma Sentinel Node	Melanoma Stage|Sentinel Lymph Node		Sociedad EspaÃ±ola de OncologÃ­a QuirÃºrgica	OBSERVATIONAL	2015-12-21	UNKNOWN	Hospital ClÃ­nico Universitario "Virgen de la Arrixaca", Murcia, 30120, Spain
NCT03602339	Comparison of Gadovist 75% Standard Dose to Dotarem at Full Standard Dose	Magnetic Resonance Imaging	DRUG: Gadoterate (Dotarem/Clariscan)|DRUG: Gadobutrol (Gadavist/Gadovist, BAY86-4875)	Bayer	INTERVENTIONAL	2018-11-14	COMPLETED	Northwestern University, Chicago, Illinois, 60611, United States|Mount Sinai Hospital, New York, New York, 10029, United States|Penn State Milton S. Hershey Medical Center, Hershey, Pennsylvania, 17033, United States|University of Texas Southwestern Medical Center, Dallas, Texas, 75390, United States|Centre Hospitalier Lyon Sud, Pierre Benite, 69495, France|CHU STRASBOURG - HÃ´pital de Hautepierr…
NCT03648463	Use of MRI Labeling Technique to Track Mesenchymal Stem Cell Survival in Orthopaedic Conditions	Cartilage Degeneration|Rotator Cuff Tear|Osteoarthritis, Knee	PROCEDURE: arthroscopy of the affected knee/ Bone Marrow Concentrate Injection	Stanford University	INTERVENTIONAL	2019-10-01	WITHDRAWN
NCT03666364	Magnetic Nanoparticle Sperm Separation for Teratozoospermia Male and Women Older Than 35 Years	Infertility	OTHER: Sperm preparation for ICSI	Ibn Sina Hospital	INTERVENTIONAL	2018-09-17	COMPLETED	Banon Assiut, Assiut, Egypt|Qena Fertility Center, Qena, 123456, Egypt|IbnSina IVF Center, Sohag, Egypt
NCT03678012	Evaluation of Anti-biofilm Effects of Ferumoxytol (Feraheme) Using an in Situ Biofilm Demineralization Model	Dental Caries	DRUG: Ferumoxytol/Hydrogen peroxide|DRUG: Hydrogen Peroxide|DRUG: Water	University of Pennsylvania	INTERVENTIONAL	2018-06-07	COMPLETED	Oral Health Research Institute, Indianapolis, Indiana, 46202, United States|University of Pennsylvania, School of dental medicine, Philadelphia, Pennsylvania, 19104, United States
NCT03688308	Bone Marrow Derived Stem Cells for the Treatment of Rotator Cuff Tears	Rotator Cuff Tear|Rotator Cuff Injury	PROCEDURE: Arthroscopic rotator cuff repair with bone marrow aspirate concentrate|PROCEDURE: Arthroscopic rotator cuff repair	Stanford University	INTERVENTIONAL	2020-01-01	WITHDRAWN	Stanford University, Redwood City, California, 94063, United States
NCT03817307	Validation of USPIO-enhanced MRI for Detection of Lymph Node Metastases in Head and Neck Carcinoma	Head and Neck Squamous Cell Carcinoma	DIAGNOSTIC_TEST: USPIO-enhanced MRI	Radboud University Medical Center	INTERVENTIONAL	2019-05-20	UNKNOWN	Radboudumc, Nijmegen, Netherlands
NCT03898687	The Use of MagtraceÂ®/SentimagÂ® in Sentinel Node Biopsy for Malignant Melanoma. The Magmen Study.	Melanoma|Sentinel Lymph Node	DEVICE: SLN Biopsy with MagtraceÂ®/SentimagÂ®	Sahlgrenska University Hospital, Sweden	INTERVENTIONAL	2019-03-01	COMPLETED	Sahlgrenska University Hospital, Gothenburg, Sweden
NCT04261777	Ferumoxtran-10-enhanced MRI in Prostate Cancer Patients	Prostate Cancer|Metastasis|Prostatectomy	DRUG: FerrotranÂ® (Ferumoxtran-10)	Saving Patients' Lives Medical B.V.	INTERVENTIONAL	2020-05-27	RECRUITING	Universitair Ziekenhuis Ghent, Gent, 9000, Belgium|CharitÃ© - UniversitÃ¤tsklinikum Berlin, Berlin, 10117, Germany|Vivantes Klinikum Am Urban, Berlin, 10967, Germany|UniversitÃ¤tsklinikum Bonn, Bonn, 53127, Germany|UniversitÃ¤tsklinikum KÃ¶ln, Cologne, 50937, Germany|UniversitÃ¤tsklinikum Carl Gustav Carus, Dresden, 01307, Germany|UniversitÃ¤tsklinikum DÃ¼sseldorf, DÃ¼sseldorf, 40225, Germany|Uni…
NCT04277377	Nanoparticle for DSA Removal	Kidney Failure|Presence of Donor Specific Antibodies		University of Zurich	OBSERVATIONAL	2021-10-05	RECRUITING	University Hospital Zurich, Division of Anaesthesiology, Zurich, ZH, 8091, Switzerland
NCT04290923	Determination of Blood Tumor Cells	Leukemia, Lymphocytic, Chronic, B-Cell|Abnormalities Cell Epithelial		University of Zurich	OBSERVATIONAL	2017-10-01	COMPLETED	University Hospital Zurich, Zurich, 8091, Switzerland
NCT04300673	Radio Guided Lymph Node Dissection in Oligometastatic Prostate Cancer Patients	Prostate Cancer|Lymph Node Metastases	PROCEDURE: Radio guided surgery (RGS) using Indium-labelled PSMA	Radboud University Medical Center	INTERVENTIONAL	2020-09-01	UNKNOWN	Radboudumc, Nijmegen, Gelderland, 6525, Netherlands|Canisius Wilhelimina Ziekenhuis, Nijmegen, Netherlands
NCT04311047	Preoperative Detection of Lymph Node Metastases in Pancreatic and Periampullary Carcinoma Using USPIO MRI	Pancreatic Cancer|Periampullary Cancer	DIAGNOSTIC_TEST: USPIO-enhanced MRI	Radboud University Medical Center	INTERVENTIONAL	2017-05-15	TERMINATED	Radboudumc, Nijmegen, 6500, Netherlands
NCT04316091	A Phase I Clinical Trial of Neoadjuvant Chemotherapy With/Without SPIONs/SMF for Patients With Osteosarcoma	Osteosarcoma	DRUG: neoadjuvant chemotherapy+SPIONs/SMF|DRUG: neoadjuvant chemotherapy	Second Affiliated Hospital, School of Medicine, Zhejiang University	INTERVENTIONAL	2020-09-01	UNKNOWN
NCT04369560	Virtual Histology of the Bladder Wall for Bladder Cancer Staging	Urinary Bladder Neoplasms	DIAGNOSTIC_TEST: Magnetic Resonance Imaging|DRUG: Gadobutrol intravesical administration (4mM)|DRUG: Ferumoxytol intravesical administration (5 mM)	Jodi Maranchie	INTERVENTIONAL	2021-01-06	RECRUITING	UPMC Department of Urology, Pittsburgh, Pennsylvania, 15232, United States
NCT04682847	Radiotherapy With Iron Oxide Nanoparticles (SPION) on MR-Linac for Primary & Metastatic Hepatic Cancers	Liver Neoplasms|Hepatic Cirrhosis|Hepatic Carcinoma|Liver Cancer|Liver Metastases|Liver Carcinoma|Hepatocellular Carcinoma|Hepatocellular Cancer|Hepatic Atrophy	DRUG: Ferumoxytol injection	Allegheny Singer Research Institute (also known as Allegheny Health Network Research Institute)	OBSERVATIONAL	2020-11-19	ACTIVE_NOT_RECRUITING	Allegheny General Hospital, Pittsburgh, Pennsylvania, 15212, United States
NCT04721262	Ferumoxytol Enhanced Hyperfine Low Field Strength MRI	Anemia, Hemolytic	DEVICE: Hyperfine Portable MRI	University of Pennsylvania	OBSERVATIONAL	2020-11-09	COMPLETED	Hospital of the University of Pennsylvania, Philadelphia, Pennsylvania, 19104, United States
NCT04722692	Delayed Sentinel Lymph Node Biopsy in Ductal Cancer in Situ	DCIS|Breast Cancer|Breast Neoplasms|Sentinel Lymph Node	DIAGNOSTIC_TEST: Delayed SLND|DIAGNOSTIC_TEST: Late SLND	Uppsala University	INTERVENTIONAL	2020-03-01	RECRUITING	Baylor College Of Medicine, Houston, Texas, 77030, United States|The University of Hong Kong-Shenzhen Hospital, Hong Kong, Hong Kong|Falun Lasarett, Falun, Dalarna, 791131, Sweden|VÃ¤xjÃ¶ County Hospital, VÃ¤xjÃ¶, Kronoberg, 35434, Sweden|SkÃ¥ne University Hospital, Lund, SkÃ¥ne, 2242, Sweden|VÃ¤stmanland County Hospital, VÃ¤sterÃ¥s, VÃ¤stmanland, 72335, Sweden|Sahlgrenska University Hospital, Go…
NCT04776980	Multimodality MRI and Liquid Biopsy in GBM	Glioblastoma Multiforme|Brain Tumor, Adult: Glioblastoma|Brain Tumor, Recurrent|Brain Tumor, Primary	DIAGNOSTIC_TEST: Post Feraheme Infusion MRI	Abramson Cancer Center at Penn Medicine	INTERVENTIONAL	2022-06	WITHDRAWN	University of Pennsylvania, Philadelphia, Pennsylvania, 19104, United States
NCT04803331	SPIO-enhanced MRI in Oral Cancer for Sentinel Lymph Node Identification	Head and Neck Squamous Cell Carcinoma	DIAGNOSTIC_TEST: SPIO-enhanced MRI	Radboud University Medical Center	INTERVENTIONAL	2021-07-27	UNKNOWN	Radboudumc, Nijmegen, Gelderland, 6500 HB, Netherlands
NCT04839185	Placental Lesions in Fetal Growth Restrictions	Fetal Growth Retardation	DRUG: Ferumoxytol infusion|PROCEDURE: MRI scan	University of Wisconsin, Madison	INTERVENTIONAL	2021-04-15	COMPLETED	University of Wisconsin-Madison, Madison, Wisconsin, 53715, United States
NCT04867954	Development of 4D Flow MRI for Risk Stratification of Variceal Bleeding in Cirrhosis	Cirrhosis, Liver|Gastroesophageal Varices	OTHER: Ensure PlusÂ®|OTHER: Pre-clinical validation contrast enhanced MRI|OTHER: Clinical validation MRI|OTHER: Pre-clinical validation contrast enhanced MRI + fasting	University of Wisconsin, Madison	OBSERVATIONAL	2021-10-28	RECRUITING	University of Wisconsin, Madison, Madison, Wisconsin, 53704, United States
NCT04900792	A Safety Study of Pharmacologic Ascorbate and Ferumoxytol in Addition to Standard of Care Chemoradiation in Glioblastoma	Glioblastoma|Glioblastoma Multiforme	DRUG: Ferumoxytol injection|DRUG: Pharmacological ascorbate|RADIATION: External beam radiation therapy|DRUG: Temozolomide	Bryan Allen	INTERVENTIONAL	2023-02-28	RECRUITING	Department of Radiation Oncology at University of Iowa, Iowa City, Iowa, 52242, United States
NCT04925557	Study to Assess the Efficacy of Mayzent on Microglia in Secondary Progressive Multiple Sclerosis	Secondary-progressive Multiple Sclerosis	DRUG: Mayzent|DRUG: Ocrevus	State University of New York at Buffalo	INTERVENTIONAL	2021-11-13	COMPLETED	University at Buffalo, Buffalo General Hospital, Buffalo, New York, 14203, United States
NCT05032937	the Accuracy and Safety of Coronary Artery Contrast-enhanced Magnetic Resonance Imaging With Polysaccharide Superparamagnetic Iron Oxide Nanoparticle	Coronary Heart Disease	DRUG: domestic polysaccharide superparamagnetic iron oxide nanoparticle	The First Affiliated Hospital with Nanjing Medical University	INTERVENTIONAL	2021-10-13	COMPLETED	First Affiliated Hospital of Nanjing Medical University, Nanjing, Jiangsu, 210029, China
NCT05045872	Assessment of Renal Vasculature and Function With Ferumoxytol-enhanced Magnetic Resonance Imaging	Chronic Kidney Diseases	DRUG: domestic polysaccharide superparamagnetic iron oxide nanoparticle	The First Affiliated Hospital with Nanjing Medical University	INTERVENTIONAL	2021-09-17	RECRUITING	First Affiliated Hospital of Nanjing Medical University, Nanjing, Jiangsu, 210029, China
NCT05052086	Magnetomotoric Ultrasound (MMUS) in Rectal Cancer	Rectal Cancer	DIAGNOSTIC_TEST: Magnetomotoric ultrasound	Region Skane	INTERVENTIONAL	2022-11-01	RECRUITING	Skane University Hospital, MalmÃ¶, section of Surgery, MalmÃ¶, SkÃ¥ne, 20501, Sweden
NCT05054062	Sentinel Lymph Node Mapping Using Magtrace and MRI in Healthy Subjects for Potential Use in Melanoma Patients	Melanoma	DIAGNOSTIC_TEST: Sentinel node mapping using MRI	Zuyderland Medisch Centrum	INTERVENTIONAL	2021-08-01	COMPLETED	Zuyderland Medical Center, Sittard, Limburg, 6162BG, Netherlands
NCT05077800	FOLFIRINOX + 9-Ing-41 + Losartan In Pancreatic Cancer	Pancreatic Adenocarcinoma|Pancreatic Adenocarcinoma Metastatic	DRUG: FOLFIRNINOX|DRUG: Losartan|DRUG: 9-ING-41	Colin D. Weekes, M.D., PhD	INTERVENTIONAL	2022-03-21	RECRUITING	Univesity of Colorado, Aurora, Colorado, 80045, United States|Massachusetts General Hospital Cancer Center, Boston, Massachusetts, 02114, United States|University of Washington, Seattle, Washington, 98109, United States
NCT05092750	Magnetic Particle-ICG Lymph Node Mapping in Colorectal Cancer	Colorectal Cancer	DEVICE: FerroTraceTM|DRUG: indocyanine green (ICG)	M.D. Anderson Cancer Center	INTERVENTIONAL	2021-09-15	WITHDRAWN
NCT05145829	Exploring an Alternative Pre-operative SLN Mapping Method Using a Magnetic Tracer and MRI for Melanoma Patients	Melanoma	DIAGNOSTIC_TEST: Diagnostic Test: Sentinel node mapping using MRI	Zuyderland Medisch Centrum	INTERVENTIONAL	2022-09-01	RECRUITING	Zuyderland Medical Center, Sittard, Limburg, 6162BG, Netherlands
NCT05161507	Magseed and Magtrace Localization for Breast Cancer	Breast Carcinoma|Breast Carcinoma Metastatic in Lymph Node	PROCEDURE: Magseed|PROCEDURE: Magtrace|PROCEDURE: Axillary lymph node metastasis - needle biopsy	University Hospital Ostrava	OBSERVATIONAL	2020-05-04	COMPLETED	University Hospital Ostrava, Ostrava, Moravian-Silesian Region, 70852, Czechia
NCT05169944	Magrolimab in Children and Adults With Recurrent or Progressive Malignant Brain Tumors	Brain Cancer|Malignant Brain Tumor|Recurrent Brain Tumor|Progressive Malignant Brain Tumor|Brain Tumor, Pediatric|Brain Tumor Adult	DRUG: Magrolimab	University of California, San Francisco	INTERVENTIONAL	2022-04-22	SUSPENDED	University of California, San Francisco, San Francisco, California, 94143, United States|Huntsman Cancer Institute, Salt Lake City, Utah, 84112, United States|University of Utah, Salt Lake City, Utah, 84113, United States
NCT05288686	Use of Superparamagnetic Iron Oxide (SPIO) in Sentinel Lymph Node Detection for Breast Cancer	Breast Cancer|Sentinel Lymph Node	PROCEDURE: sentinel lymph node biopsy procedure	The University of Hong Kong	INTERVENTIONAL	2018-07-24	ACTIVE_NOT_RECRUITING	University of Hong Kong, Hong Kong, Hong Kong
NCT05357833	Novel Imaging Markers in SPMS	Secondary Progressive Multiple Sclerosis|Multiple Sclerosis, Secondary Progressive|Multiple Sclerosis	DRUG: Ferumoxytol infusion|DRUG: Gadoteridol|DIAGNOSTIC_TEST: MRI Brain and Cervical Spine	University of Utah	INTERVENTIONAL	2022-06-01	COMPLETED	University of Utah Health Imaging and Neurosciences Center, Salt Lake City, Utah, 84108, United States
NCT05359783	Sentinel Node Localization and Staging With Low Dose Superparamagnetic Iron Oxide	Breast Cancer|Sentinel Lymph Node	DRUG: Superparamagnetic Iron Oxide	Vastra Gotaland Region	INTERVENTIONAL	2021-11-01	ACTIVE_NOT_RECRUITING	Sahlgrenska University Hospital, Gothenburg, 41345, Sweden
NCT05504369	Effects of Magnetic Tape on the Autonomic Nervous System	Low Back Pain	OTHER: Magnetic tape|OTHER: Placebo tape	Florida Gulf Coast University	INTERVENTIONAL	2020-01-01	COMPLETED	University of Valencia, Valencia De AlcÃ¡ntara, 46010, Spain
NCT05515874	Predicting Stroke Risk in ICAD With Novel MRI	Intracranial Atherosclerosis	DRUG: Feraheme	Northwestern University	INTERVENTIONAL	2021-08-16	RECRUITING	Northwestern University, Chicago, Illinois, 60611, United States
NCT05569707	MR Lymphography and Magnetic Sentinel Lymph Node Biopsy in Melanoma Patients	Melanoma (Skin)	DEVICE: Magnetic sentinel lymph node biopsy by use of MagtraceÂ®, in combination with SentiMagÂ® and DiffMag	University of Twente	INTERVENTIONAL	2023-01	NOT_YET_RECRUITING	Medisch Spectrum Twente, Enschede, Netherlands|Ziekenhuisgroep Twente (ZGT), Hengelo, Netherlands
NCT05625698	Premarking of Axillary Nodes Before Start of Neoadjuvant Chemotherapy Using Magnetic Approach	Breast Cancer	DRUG: MagTrace only|COMBINATION_PRODUCT: MagTrace and Magseed	Vastra Gotaland Region	INTERVENTIONAL	2021-10-01	COMPLETED	Sahlgrenska University Hospital, Gothenburg, 413 45, Sweden
NCT05656300	Glioblastoma Imaging Using a Strong Iron-like Bloodpool Contrast Medium?	Glioblastoma	DIAGNOSTIC_TEST: MRI scan using USPIO particles	Radboud University Medical Center	OBSERVATIONAL	2023-04-01	NOT_YET_RECRUITING
NCT05658172	Standard Surveillance vs. Intensive Surveillance in Early Breast Cancer	Breast Cancer	DIAGNOSTIC_TEST: Determination of tumormarkers (CA27.29, CEA, CA125)|DIAGNOSTIC_TEST: Determination of CTC levels|DIAGNOSTIC_TEST: Determination of ctDNA levels|OTHER: Biobanking of blood samples	Prof. Wolfgang Janni	INTERVENTIONAL	2022-12-07	RECRUITING	University Hospital Ulm Gynecology/Obstetrics, Ulm, 89075, Germany
NCT05666700	CAR-T Cell Therapy in RelApsed/Refractory Myeloma With ExtrameduLlary Disease - an in Vivo Imaging and Molecular Monitoring Study	Extramedullary Myeloma	BIOLOGICAL: Combination Product: JNJ-68284528 (Cilta-cel) & 64Cu SPION dual PET-MR imaging agent	Peter MacCallum Cancer Centre, Australia	INTERVENTIONAL	2023-12-08	RECRUITING	Peter MacCallum Cancer Centre, Melbourne, Victoria, 3000, Australia
NCT05690542	Nanoparticles in Blood: Understanding and Controlling Protein Corona for Optimized Nanomedicine	Coagulation Tests	OTHER: blood tests	Centre Hospitalier Universitaire Dijon	OBSERVATIONAL	2023-02	NOT_YET_RECRUITING	CHU DIJON BOURGOGNE - laboratoire mixte, Dijon, 21000, France
NCT05811377	Phenotyping Interstitial Cystitis/Bladder Pain Syndrome (IC/BPS) by Intravesical Contrast Enhanced - Magnetic Resonance Imaging (ICE-MRI) Bladder Permeability Assay	IC - Interstitial Cystitis	DRUG: Ferumoxytol|DRUG: Gadobutrol	Christopher J Chermansky, MD	INTERVENTIONAL	2023-03-29	RECRUITING	UPMC Magee Women's Hospital, Pittsburgh, Pennsylvania, 15213, United States
NCT05928299	Integrative Multi-Omics Testing for Immunotherapy Response in Non-Small Cell Lung Cancer	Lung Cancer		Nanfang Hospital, Southern Medical University	OBSERVATIONAL	2020-01-01	RECRUITING	Nanfang hospital, Guangzhou, Guangdong, 510400, China
NCT05959590	Ferumoxytol-enhanced Imaging of Osteomyelitis	Osteomyelitis	DRUG: Ferumoxides 11.2Mg Solution for Injection	University of New Mexico	INTERVENTIONAL	2014-02-12	COMPLETED	University of New Mexico, Albuquerque, New Mexico, 87131, United States
NCT05985551	Delayed SLND for Patients With Breast Cancer Undergoing Primary Systemic Treatment	Breast Cancer|Chemotherapy Effect|Sentinel Lymph Node	OTHER: SLND or TAD by the magnetic technique (SPIO)	Uppsala University	OBSERVATIONAL	2020-01-01	ACTIVE_NOT_RECRUITING	Uppsala University Hospital, Uppsala, 75185, Sweden
NCT06010537	Contrast-enhanced Magnetic Resonance Imaging With Polysaccharide Superparamagnetic Iron Oxide Nanoparticle	Magnetic Resonance Imaging	DRUG: polysaccharide superparamagnetic iron oxide injection	Chia Tai Tianqing Pharmaceutical Group Co., Ltd.	INTERVENTIONAL	2021-04-28	COMPLETED	Xinxiang Central Hospital, Xinxiang, Henan, 453000, China
NCT06051565	Cardiovascular Contrast-enhanced Magnetic Resonance Imaging Using Polysaccharide Superparamagnetic Iron Oxide Injection in Diabetic Patients	Diabetes|Magnetic Resonance Imaging	DRUG: Polysaccharide superparamagnetic iron oxide injection	Chia Tai Tianqing Pharmaceutical Group Co., Ltd.	INTERVENTIONAL	2021-11-06	COMPLETED	Beijing Luhe Hospital, Capital Medical University, Beijing, Beijing, 101149, China
NCT06052969	Pulse Endovascular ReperFUSION for Acute Ischemic Stroke	Acute Ischemic Stroke AIS|Cerebral Arterial Disease	DEVICE: Pulse NanoMED System	Euphrates Vascular, Inc.	INTERVENTIONAL	2023-10-01	RECRUITING	University of South Carolina - Prisma, Columbia, South Carolina, 29203, United States
NCT06104371	Lymph Node Identification Using Magtrace and Magseed Before Chemotherapy	Breast Cancer	DEVICE: Magtrace	Vastra Gotaland Region	OBSERVATIONAL	2024-12-01	NOT_YET_RECRUITING	Sahlgrenska University Hospital, Gothenburg, 413 45, Sweden
NCT06110494	A New Clinical Use of Ferumoxytol Nanoparticles: An Antibiofilm Treatment	Apical Periodontitis|Pulp Disease, Dental	DRUG: Iron oxide nanoparticles treatment Ferumoxytol/H2O2|DRUG: NaOCl|DRUG: NaCl|DRUG: supplementary irrigation	University of Pennsylvania	INTERVENTIONAL	2020-07-13	COMPLETED	University of Pennsylvania, Philadelphia, Pennsylvania, 19104, United States
NCT06136806	Diagnostic Performance of a Novel Ferumoxytol-Enhanced Magnetic Resonance Angiography/ Venography on Panvascular Disease	Panvascular Disease	DIAGNOSTIC_TEST: Ferumoxytol Enhanced Magnetic Resonance Angiographyï¼ˆ FE-MRAï¼‰ï¼›Coronary/Renal /Lower artery Arteriography|DIAGNOSTIC_TEST: Ferumoxytol Enhanced Magnetic Resonance Venographyï¼ˆ FE-MRVï¼‰, Computed Tomography Pulmonary Angiography, Ultrasound for Lower Extremity Deep Vein.	The First Affiliated Hospital with Nanjing Medical University	OBSERVATIONAL	2023-11-13	RECRUITING	First Affiliated Hospital of Nanjing Medical University, Nanjing, Jiangsu, 210000, China
NCT06146751	A Novel Ferumoxytol-enhanced Cardiac Magnetic Resonance Imaging for the Detection of Intracardiac Thrombus	Heart Aneurysm	DRUG: Superparamagnetic Iron Oxide Nanoparticles	The First Affiliated Hospital with Nanjing Medical University	OBSERVATIONAL	2023-11-01	RECRUITING	The First Affiliated Hospital of Nanjing Medical University, Nanjing, Jiangsu, 210029, China
NCT06169072	Sentinel Lymph Node Localisation With an Ultra-low Dose of Magtrace in Breast Cancer Patients	Breast Cancer|Sentinel Lymph Node	DRUG: Superparamagnetic Iron Oxide|DEVICE: Technetium99	Vastra Gotaland Region	INTERVENTIONAL	2023-01-01	RECRUITING	Sahlgrenska Iniversity Hospital, Gothenburg, 41345, Sweden
NCT06261983	Magnetic Localization of Sentinel Nodes in Squamous Cell Oral Carcinoma.	Diagnostic Value of Sentinel Node Biopsy Guided by Magnetic Probe	PROCEDURE: Sentinel node biopsy guided by magnetic probe	Hospital Donostia	OBSERVATIONAL	2018-10-01	RECRUITING	JosuÃ© Hernando VÃ¡zquez, Donostia, Guipuzkoa, 20011, Spain
NCT06271564	Effectiveness of Topical Magnetite Zinc Oxide Composite Nanoparticles in the Management of Oral Potentially Malignant Lesions	Oral Potentially Malignant Lesions	DRUG: Magnetite ZnO Composite Nanoparticles|DRUG: Topical Placebo Gel	Ain Shams University	INTERVENTIONAL	2024-02-29	RECRUITING	Faculty of Dentistry Ain shams University, Cairo, Egypt
NCT06273501	MRI and Magnetometer-guided Sentinel Lymph Node Detection in Vulvar Cancer	Vulvar Cancer|Lymph Node Metastasis	DRUG: Magtrace	Sahlgrenska University Hospital, Sweden	INTERVENTIONAL	2022-03-24	ENROLLING_BY_INVITATION	Department of Obstetrics and gynecology, Gothenburg, 41345, Sweden
NCT06348524	Ferumoxytol-enhanced Magnetic Resonance Imaging	Coronary Artery Disease	DRUG: Ferumoxytol injection	Transmed Solutions	INTERVENTIONAL	2024-08-03	NOT_YET_RECRUITING
NCT06440408	Calculating Wall Shear Stress in Infant Pulmonary Veins	Pulmonary Vein Stenosis	DRUG: Ferumoxytol	Children's Hospital of Philadelphia	INTERVENTIONAL	2024-09	NOT_YET_RECRUITING	Children's Hospital of Philadelphia, Philadelphia, Pennsylvania, 19104, United States
NCT06463600	Tumour Localisation With Magnetic Clip Before Neoadjuvant Chemotherapy.	Breast Conserving Surgery	DEVICE: Magseed|DEVICE: Metallic clip and guide wire	Sahlgrenska University Hospital, Sweden	INTERVENTIONAL	2024-02-01	RECRUITING	Sahlgrenska Academy at Gothenburg University, Gothenburg, GÃ¶teborg, 41345, Sweden
NCT06483061	Enhanced MRI Imaging in Healthy Participants and Participants With Epilepsy	Epilepsy, Temporal Lobe	DRUG: Ferumoxytol	University of Alberta	INTERVENTIONAL	2024-09	NOT_YET_RECRUITING	Peter S. Allen MRI Unit, Edmonton, Alberta, T6G 2R3, Canada
NCT06540443	Pilot Study of MPB-2043 Enhanced MRI for Nodal Staging in Head and Neck Squamous Cell Carcinomas	Head and Neck Squamous Cell Carcinoma|Lymph Node Metastasis	DRUG: MPB-2043 of 0.5 mg/kg|DRUG: MPB-2043 of 1.0 mg/kg|DRUG: MPB-2043 of 2.0 mg/kg|DRUG: MPB-2043 of 3.0 mg/kg	MegaPro Biomedical Co. Ltd.	INTERVENTIONAL	2024-09	NOT_YET_RECRUITING	National Taiwan University Hospital, Taipei, 100, Taiwan
NCT06551805	Clinical Research Protocol of Ferumoxytol for Magnetic Resonance Enhancement Imaging in Patients With Atherosclerosis.	Atherosclerosis	DRUG: Safety assessment of Ferumoxytol.|DRUG: Assessment of the diagnostic value of Ferumoxytol for MR angiography.	The Affiliated Nanjing Drum Tower Hospital of Nanjing University Medical School	OBSERVATIONAL	2024-08-12	RECRUITING	Department of Radiology, the Affiliated Drum Tower Hospital of Nanjing University, Nanjing, Jiangsu, 210008, China
NCT06572475	USPIO Enhanced MR Imaging in CNS Tumours (UMIC)	Vestibular Schwannoma|Glioma, Astrocytic	DIAGNOSTIC_TEST: USPIO enhanced MRI	Northern Care Alliance NHS Foundation Trust	INTERVENTIONAL	2024-04-26	RECRUITING	Salford Royal Hospital Northern Care Alliance NHS Foundation Trust, Salford, Greater Manchester, M6 6HD, United Kingdom
