# Supplementary material for: Advances in magnetic nanoparticles for molecular medicine
Source: Royal Society of Chemistry journal article supplement (doi:10.1039/d4cc05167j), 2025-01-01
Supplement: d4cc05167j2.pdf [file d4cc05167j2.pdf]

[illegible]

|                 |              |                                                                                                                                                     |                                                                      |                                                                                      |                |                    |                        |                                               |
|-----------------|--------------|-----------------------------------------------------------------------------------------------------------------------------------------------------|----------------------------------------------------------------------|--------------------------------------------------------------------------------------|----------------|--------------------|------------------------|-----------------------------------------------|
| Iron Supplement | NCT05440408  | Calculating Wall Shear Stress in Infant Pulmonary Veins                                                                                             | Pulmonary Vein Stenosis                                              | DRUG: Ferumoxytol                                                                    | INTERVENTIONAL | 2024-09            | NOT_YET_RECRUITING     | United States                                 |
|                 | NCT05463900  | Tumour Localisation With Magnetic Clip Before Neoadjuvant Chemotherapy                                                                              | Breast Conserving Surgery                                            | DEVICE: Magseed DEVICE: Metallic clip and guide wire                                 | INTERVENTIONAL | 2024-02-01         | RECRUITING             | Sweden                                        |
|                 | NCT05493301  | Enhanced MRI Imaging in Healthy Participants and Participants With Epilepsy                                                                         | Epilepsy: Temporal Lobe                                              | DRUG: Ferumoxytol                                                                    | INTERVENTIONAL | 2024-09            | NOT_YET_RECRUITING     | Canada                                        |
|                 | NCT05404443  | Pilot Study of MPB-2043 Enhanced MRI for Nodal Staging in Head and Neck Squamous Cell Carcinomas                                                    | Head and Neck Squamous Cell Carcinoma Lymph Node Metastasis          | DRUG: MPB-2043 of 0.5 mg/kg DRUG: MPB-2043 of 1.0 mg/kg DRUG: MPB-204 INTERVENTIONAL | 2024-09        | NOT_YET_RECRUITING | Taiwan                 |                                               |
|                 | NCT05519805  | Clinical Research Protocol of Ferumoxytol for Magnetic Resonance Enhancement Imaging in Patients With Atherosclerosis                               | Atherosclerosis                                                      | DRUG: Safety assessment of Ferumoxytol   DRUG: Assessment of the diagnostic          | OBSERVATIONAL  | 2024-08-12         | RECRUITING             | China                                         |
|                 | NCT06072475  | USPD Enhanced MR Imaging in CNS Tumours (EMC)                                                                                                       | Vestibular Schwannoma Glioma, Astrocytic                             | DIAGNOSTIC: TEST: USPD enhanced MRI                                                  | INTERVENTIONAL | 2024-04-26         | RECRUITING             | United Kingdom                                |
|                 | NCT05254424  | Ferumoxytol Versus Oral Iron in the Treatment of Anemia in Non-Dialysis Dependent Chronic Kidney Disease Patients                                   | Anemia                                                               | DRUG: Ferumoxytol or oral iron                                                       | INTERVENTIONAL | 2024-05            | COMPLETED              | United States                                 |
|                 | NCT0525437   | Ferumoxytol Versus Oral Iron in the Treatment of Anemia in Non-Dialysis Dependent Chronic Kidney Disease Patients                                   | Anemia                                                               | DRUG: Ferumoxytol or oral iron                                                       | INTERVENTIONAL | 2024-06            | COMPLETED              | United States                                 |
|                 | NCT0525440   | A Crossover Safety Study of Ferumoxytol Versus Placebo                                                                                              | Anemia                                                               | DRUG: Ferumoxytol or placebo                                                         | INTERVENTIONAL | 2025-01            | COMPLETED              | United States                                 |
|                 | NCT05239907  | Ferumoxytol Versus Oral Iron in the Treatment of Anemia in Hemodialysis Patients                                                                    | Anemia                                                               | DRUG: Ferumoxytol or oral iron                                                       | INTERVENTIONAL | 2024-08            | COMPLETED              | United States                                 |
|                 | NCT05060425  | A Study of the Electrocardiogram Effects and Pharmacokinetics of Ferumoxytol in Healthy Men and Women                                               | Anemia                                                               | DRUG: Ferumoxytol DRUG: methylthionin DRUG: placebo                                  | INTERVENTIONAL | 2024-05            | COMPLETED              | United States                                 |
|                 | NCT01927779  | A Trial Comparing Ferumoxytol to Iron Sucrose for the Treatment of Iron Deficiency Anemia in Adult Subjects With Chronic Kidney Disease             | Iron Deficiency Anemia Kidney Disease                                | DRUG: Ferumoxytol DRUG: Iron Sucrose                                                 | INTERVENTIONAL | 2010-03-01         | COMPLETED              | United States, Canada, and Germany, et al.    |
|                 | NCT01141139  | A Trial Comparing Ferumoxytol With Placebo for the Treatment of Iron Deficiency Anemia                                                              | Iron Deficiency Anemia                                               | DRUG: Ferumoxytol OTHER: Placebo                                                     | INTERVENTIONAL | 2010-06-19         | COMPLETED              | United States, Canada, and India, et al.      |
|                 | NCT01114204  | A Trial Comparing Ferumoxytol With Iron Sucrose for the Treatment of Iron Deficiency Anemia                                                         | Iron Deficiency Anemia                                               | DRUG: Ferumoxytol DRUG: Iron Sucrose                                                 | INTERVENTIONAL | 2010-08-10         | COMPLETED              | Australia, France, and Germany, et al.        |
|                 | NCT01114217  | A Trial of Ferumoxytol for the Episodic Treatment of Iron Deficiency Anemia                                                                         | Iron Deficiency Anemia                                               | DRUG: Ferumoxytol                                                                    | INTERVENTIONAL | 2010-07-27         | COMPLETED              | United States, Canada, and Hungary, et al.    |
|                 | NCT01148745  | Iron Indices and Intravenous Ferumoxytol: Time to Steady State                                                                                      | Iron Deficiency Anemia                                               | DRUG: Ferumoxytol                                                                    | INTERVENTIONAL | 2010-03            | COMPLETED              | United States                                 |
|                 | NCT01155375  | A Trial of Ferumoxytol for the Treatment of Iron Deficiency Anemia in Pediatric Participants With Chronic Kidney Disease                            | Iron Deficiency Anemia                                               | DRUG: Ferumoxytol DRUG: Oral Iron                                                    | INTERVENTIONAL | 2011-10-17         | TERMINATED             | United States                                 |
|                 | NCT01155388  | A Trial of Ferumoxytol for the Treatment of Iron Deficiency Anemia in Pediatric Participants With Non-dialysis-Dependent Chronic Kidney Disease     | Iron Deficiency Anemia Non-dialysis-dependent Chronic Kidney Disease | DRUG: Ferumoxytol DRUG: Oral Iron                                                    | INTERVENTIONAL | 2011-10-17         | TERMINATED             | United States                                 |
|                 | NCT015274919 | Total Dose Infusion of Ferumoxytol in 15 Minutes for Iron Deficiency Anemia                                                                         | Iron Deficiency Anemia                                               | DRUG: Ferumoxytol                                                                    | INTERVENTIONAL | 2011-06            | COMPLETED              | United States                                 |
|                 | NCT01227616  | Compare Efficacy/Safety of Repeat Doses of Ferumoxytol With Iron Sucrose in CKD Subjects With IDA and on Hemodialysis                               | Iron Deficiency Anemia Treatment Chronic Kidney Disease CKD          | DRUG: Ferumoxytol DRUG: Iron Sucrose                                                 | INTERVENTIONAL | 2013-08            | COMPLETED              | United States, Canada, and United Kingdom     |
|                 | NCT01942480  | Ferumoxytol for Iron-Deficiency Anemia in Chronic Kidney Disease and Peritoneal Dialysis Patients                                                   | Iron Deficiency Anemia Inflammation Oxidative Stress                 | DRUG: Ferumoxytol                                                                    | INTERVENTIONAL | 2013-09            | COMPLETED              | Canada                                        |
|                 | NCT01504670  | A Trial of Ferumoxytol for the Episodic Treatment of Iron Deficiency Anemia in Pediatric Participants With Chronic Kidney Disease                   | Iron Deficiency Anemia                                               | DRUG: Ferumoxytol                                                                    | INTERVENTIONAL | 2011-12-27         | TERMINATED             | United States                                 |
|                 | NCT01984554  | Observational Study on the Use of IV (Intravenous) Iron Therapy Among Subjects With Iron Deficiency Anemia                                          | Iron Deficiency Anemia (IDA)                                         | DRUG: Ferumoxytol                                                                    | OBSERVATIONAL  | 2013-09            | COMPLETED              | United States                                 |
|                 | NCT02189889  | Active Preoperative Anemia Management in Patients Undergoing Cardiac Surgery                                                                        | Anemia Cardiovascular Disease                                        | DRUG: EPO DRUG: Feraheme                                                             | INTERVENTIONAL | 2013-04-09         | TERMINATED             | United States                                 |
|                 | NCT03649178  | A Phase II Safety Study of Ferumoxytol Compared to Ferric Carboxymaltose for the Treatment of Iron Deficiency Anemia (IDA)                          | Iron Deficiency Anemia                                               | DRUG: Ferumoxytol DRUG: FCM                                                          | INTERVENTIONAL | 2016-02-29         | COMPLETED              | United States, Canada, and Hungary, et al.    |
|                 | NCT02493934  | Pilot Study: Randomized, Placebo-controlled Comparator Trial of IV vs Oral Iron Treatment of RLS With IDA (pICR-IDA)                                | Restless Legs Syndrome Iron Deficiency Anemia                        | DRUG: Ferumoxytol Intravenous DRUG: Ferrous sulfate                                  | INTERVENTIONAL | 2014-08            | COMPLETED              | United States                                 |
|                 | NCT03019850  | A Study to Evaluate the Safety (Compared to Iron Sucrose), Efficacy and Pharmacokinetics of Ferumoxytol for the Treatment of Iron Deficiency Anemia | Chronic Kidney Disease: Iron Deficiency Anemia                       | DRUG: Ferumoxytol DRUG: Iron sucrose                                                 | INTERVENTIONAL | 2016-08-13         | RECRUITING             | United States, Hungary, and Lithuania, et al. |
|                 | NCT03657433  | Intravenous Infusions of Ferumoxytol Compared to Oral Ferrous Sulfate for the Treatment of Anemia in Pregnancy                                      | Iron Deficiency Anemia of Pregnancy                                  | DIETARY: SUPPLEMENT: Ferrous sulfate 325mg DRUG: Ferumoxytol                         | INTERVENTIONAL | 2018-12-17         | COMPLETED              | United States                                 |
|                 | NCT03777614  | Intravenous (IV) Versus Oral Iron Treatment of Iron Deficiency Anemia in the Post-operative Bariatric Surgical Patient                              | IDA in the Post-Bariatric Surgical Patient                           | DRUG: Ferumoxytol DRUG: Ferrous sulfate OTHER: Oral vitamin C OTHER: Intravenous     | INTERVENTIONAL | 2019-08            | WITHDRAWN              | United States                                 |
|                 | NCT03603645  | A Study to Evaluate Ferumoxytol for the Treatment of Iron Deficiency Anemia (IDA) in Pediatric Subjects                                             | Iron Deficiency Anemia                                               | DRUG: Ferumoxytol DRUG: Iron sucrose                                                 | INTERVENTIONAL | 2018-09-18         | RECRUITING             | United States, Lithuania, and Poland          |
|                 | NCT04063098  | Study to Assess Feasibility and Safety of Iron Replacement With Feraheme in Iron Deficient Patients With Durable Ventricular Assist Device Support  | Anemia, Iron Deficiency                                              | DRUG: Ferumoxytol injection                                                          | INTERVENTIONAL | 2020-01-15         | TERMINATED             | United States                                 |
|                 | NCT04205286  | IV Iron vs Oral Iron for Treatment of Anemia in Women With Abnormal Uterine Bleeding                                                                | Anemia, Iron Deficiency Heavy Menstrual Bleeding                     | DRUG: Ferumoxytol DRUG: Ferrous Sulfate                                              | INTERVENTIONAL | 2020-02-14         | RECRUITING             | United States                                 |
|                 | NCT04526368  | Comparison of Oral Ferrous Sulfate to Intravenous Ferumoxytol in Adolescent Iron Deficiency Anemia                                                  | Pregnancy Related Anemia, Iron Deficiency                            | DRUG: Ferumoxytol Injection  Feraheme DRUG: Ferrous Sulfate                          | INTERVENTIONAL | 2021-01-21         | ACTIVE, NOT_RECRUITING | United States                                 |
|                 | NCT04268889  | Trial of IV vs Oral Iron Treatment of Iron Deficiency Anemia in the Post-Operative Bariatric Surgical Patient                                       | Iron Deficiency Anemia                                               | DRUG: Ferumoxytol DRUG: Saline DRUG: Ferrous sulfate tablets DRUG: Vitamin           | INTERVENTIONAL | 2020-02-27         | RECRUITING             | United States                                 |
|                 | NCT04278651  | Early Antenatal Support for Iron Deficiency Anemia                                                                                                  | Pregnancy Related Anemia, Iron Deficiency Anemia of Pregnancy        | DRUG: Ferumoxytol DRUG: Ferrous Sulfate                                              | INTERVENTIONAL | 2021-09-29         | RECRUITING             | United States                                 |
|                 | NCT05240465  | Dabze Plus IV Iron to Decrease Transfusions While Maintaining Iron Sufficiency in Preterm Infants                                                   | Preterm Iron-deficiency Iron Deficiency Anemia Iron Malabsorption    | DRUG: Dabzopentin DRUG: Low Molecular Weight Iron Dextran DRUG: Feru                 | INTERVENTIONAL | 2022-11-27         | RECRUITING             | United States                                 |

Source: clinicaltrials.gov
